# Supplementary material for: Low doses of the neonicotinoid insecticide imidacloprid induce ROS triggering neurological and metabolic impairments in Drosophila
Source: PubMed Central journal article supplement — Proc Natl Acad Sci U S A. 2020 Sep 28;117(41):25840–50. doi: 10.1073/pnas.2011828117 (PMC7568275; doi:10.1073/pnas.2011828117), 2020-09-28
Supplement: pnas.2011828117.sapp.pdf [file pnas.2011828117.sapp.pdf]

Supplementary Information for

## Low doses of the neonicotinoid insecticide imidacloprid induce oxidative stress triggering neurological and metabolic impairments in *Drosophila melanogaster*

Felipe Martelli<sup>a,1</sup>, Zuo Zhongyuan<sup>b</sup>, Julia Wang<sup>b</sup>, Ching-On Wong<sup>c</sup>, Nicholas E. Karagas<sup>d</sup>, Ute Roessner<sup>a</sup>, Thusitha Rupasinghe<sup>a,2</sup>, Kartik Venkatachalam<sup>d</sup>, Trent Perry<sup>a</sup>, Hugo J. Bellen<sup>b,e,f,3</sup>, Philip Batterham<sup>a,3,4</sup>

<sup>a</sup>School of BioSciences, The University of Melbourne, Parkville, VIC, 3052, Australia;

<sup>b</sup>Department of Molecular and Human Genetics, Baylor College of Medicine, Houston, TX 77030;

<sup>c</sup>Department of Integrative Biology and Pharmacology, McGovern Medical School at the University of Texas Health Sciences Center, Houston, TX 77030;

<sup>d</sup>Neurological Research Institute, Texas Children's Hospital, Houston, TX 77030;

<sup>f</sup>Howard Hughes Medical Institute, Baylor College of Medicine, Houston, TX 77030

To whom correspondence may be addressed. Email: p.batterham@unimelb.edu.au

<sup>1</sup>Present address: School of Biological Sciences, Monash University, Clayton, VIC 3800, Australia.

<sup>2</sup>Present address: SCIEX, Life Science Research (Lipidomics), VIC 3170, Australia.

<sup>3</sup>H.J.B and P.B. contributed equally to this work.

### **This PDF file includes:**

Supplementary Materials and Methods  
Supplementary Materials and Methods References  
Figures S1 to S5  
Tables S1 to S2

## Supplementary Materials and Methods

### Collecting third instar larvae

3 to 5 days old male (n = 6) and female (n = 30) adult flies were placed into vials on standard food media. The flies were left undisturbed for 24 hours for oviposition and then cleared from vials, which were maintained at 25°C for 5 additional days at which point in time third instar larvae were collected. Larvae were recovered from the food using 20% w/v sucrose solution (non-Analytical Reagent) into each vial. The top layer of food was then gently disrupted with a metal rod in order to release the larvae, which float in the sucrose solution. The solution was then carefully poured onto a fine cloth mesh to isolate the larvae and transferred onto grape juice agar plates (#Food media recipes).

### Food media recipes

| Standard Food (1L)        |        | Grape Juice Plates (1L) |        | Molasses Food (1L)        |        |
|---------------------------|--------|-------------------------|--------|---------------------------|--------|
| <i>H<sub>2</sub>O</i>     | 987 mL | <i>H<sub>2</sub>O</i>   | 720 mL | <i>H<sub>2</sub>O</i>     | 800 mL |
| <i>Potassium Tartrate</i> | 8.0 g  | <i>Agar</i>             | 20 g   | <i>Molasses</i>           | 160 mL |
| <i>Calcium Chloride</i>   | 0.5 g  | <i>Apple Juice</i>      | 200 mL | <i>Maize meal</i>         | 60 g   |
| <i>Agar</i>               | 5.0 g  | <i>Brewer's Yeast</i>   | 7.0 g  | <i>Dried active yeast</i> | 15 g   |
| <i>yeast</i>              | 12 g   | <i>Glucose</i>          | 52 g   | <i>Agar</i>               | 6.0 g  |
| <i>Glucose</i>            | 53 g   | <i>Sucrose</i>          | 26 g   | <i>Acid mix</i>           | 7.5 mL |
| <i>Sucrose</i>            | 27 g   | <i>Tegosept</i>         | 6.0 mL | <i>Tegosept</i>           | 5.0 mL |
| <i>Semolina</i>           | 67 g   |                         |        |                           |        |
| <i>Acid Mix</i>           | 12 mL  |                         |        |                           |        |
| <i>Tegosept</i>           | 15 mL  |                         |        |                           |        |

### Insecticide dilution and exposure

Pure imidacloprid (Sigma Aldrich) was used in all assays. The chemical was diluted with dimethyl sulfoxide (DMSO) to create a 1000 ppm stocks solution which was kept on freezer (-20°C). Before exposures, 5x stocks were generated for the dose being used by diluting the 1000 ppm stock in 5% Analytical Reagent Sucrose (Chem Supply) solution. An equivalent volume of DMSO replaced the insecticide for controls. For larval acute exposure assays, third instar larvae were exposed in 5% w/v sucrose (Chem Supply) in NUNC cell plates (Thermo-Scientific) dosed with the desired insecticide concentration for up to 2 hr. For adult exposures, the insecticide was diluted in lukewarm food. An equivalent volume of DMSO replaced the insecticide for controls. A new batch of treated food was cooked every week and vials were replaced every second day. Adult flies chronically exposed were kept in dark at 25°C.

### Larval movement assay

Larval movement in response to insecticide exposure was quantified by Wiggle Index Assay, as described in (1). Briefly, 25 third instar larvae were used for a single biological replicate and four replicates were tested for each exposure condition. Larvae placed into NUNC cell plates (Thermo-Scientific) in 5% Analytical Reagent Sucrose (Chem Supply) solution were filmed for 30 seconds before insecticide exposure. After adding insecticide solution larvae were filmed again at the desired time-points. Videos were analyzed in R software (v.3.4.3) using the WI script. The motility in response to each insecticide is expressed in terms of Relative Movement Ratio (RMR), normalized to motility prior to addition of the insecticide.

#### Larval viability and adult survival tests

For all tests 5 replicates of 20 individuals (100 individuals) per condition were used. In assessing third instar larval viability and metamorphosis following insecticide exposure, individuals were rinsed three times with 0.5% w/v sucrose (Chem Supply) and placed in vials on insecticide-free food medium. For the following 10 days the vials were scored for dead larvae, pupae or adults. Cumulative adult emergence from larvae exposed to 2.5 ppm imidacloprid for 2 hr was analyzed using the Kolmogorov–Smirnov test. To examine the survival of adult flies chronically exposed to 4 ppm imidacloprid, 5 replicates of 20 females (3-5 days old) were exposed for 25 days. The same number of flies was used for the control group. Statistical analysis was based on the Kaplan-Meier method and the data were compared by the Log-rank Mantel-Cox test.

#### Evaluation of mitochondrial turnover

Larvae of the MitoTimer line were exposed to 2.5 ppm imidacloprid for 2 hr. Control larvae were exposed to 2.5ppm DMSO. Midguts and brains were dissected in PBS and fixed in 4% PFA (Electron Microscopy Science) and mounted in Vectashield (Vector Laboratories). 20 proventriculus and 20 pairs of optical lobes were analyzed for each condition. Confocal microscopy images were obtained in Leica SP5 Laser Scanning Confocal Microscope at 200x magnification for both green (excitation/emission 488/518 nm) and red (excitation/emission 543/572 nm) signals. Three independent measurements along the z stack were analyzed for each sample. Fluorescence intensity was quantified on ImageJ software and results were analyzed using a t-test.

#### Systemic mitochondrial aconitase activity

Relative mitochondrial aconitase activity was quantified using the colorimetric Aconitase Activity Assay Kit from Sigma (#MAK051), following manufacturer's instructions. A total of 6 samples (25 whole larvae per sample) were exposed to 2.5 ppm imidacloprid for 2 hr, whilst 6 control samples (25 whole larvae per sample) were exposed to DMSO for 2 hr. The final reaction absorbance was measured at 450 nm in a FLUOstar OPTIMA (BMG Labtech) microplate reader using the software OPTIMA. Sample absorbance was initially normalized to the respective sample weight and then absorbance levels of exposed animal samples were normalized to the absorbance levels for controls. Data were analyzed using a t-test.

#### Systemic ATP levels

Relative ATP levels were quantified fluorometrically using an ATP assay kit (Abcam, #83355), following manufacturer's instructions. A total of 6 samples (20 larvae per sample) were exposed to 2.5 ppm imidacloprid for 2 hr, whilst 6 control samples (20 larvae per sample) were exposed to DMSO for 2 hr. The final reaction fluorescence was measured at excitation/emission = 535/587 nm in FLUOstar OPTIMA (BMG Labtech) microplate reader using the software OPTIMA. Sample fluorescence was initially normalized to the respective sample weight and then fluorescence levels of exposed animal samples were normalized to absorbance levels in controls. Data were analyzed using a t-test.

#### Measurement of superoxide ( $O_2^{\cdot-}$ ) levels

To evaluate the level of reactive oxygen species (ROS) we stained tissues with dihydroethidium (DHE – Sigma-Aldrich), as described in (2). Briefly, larvae were dissected in Schneider's Drosophila Medium 1x (GIBCO) and incubated in the same medium containing 30  $\mu$ M DHE at room temperature on an orbital shaker for 7 minutes in dark. Three washing steps of five minutes each were performed with Schneider's Drosophila Medium 1x. Tissues were fixed in 8% PFA (Electron Microscopy Science) for 5 minutes at room temperature on an orbital shaker in the dark. Tissues were then rinsed once with PBS (Ambion) and mounted in Vectashield (Vector Laboratories). Confocal microscopy images were obtained using a Leica SP5 Laser Scanning Confocal Microscope at 200x magnification (excitation/emission 518/605 nm). Third instar larvae were exposed to 2.5 ppm imidacloprid for 1 or 2 hr. Controls were exposed to equivalent doses of DMSO. A total of 15 brains and 15 midguts were assessed for each condition. Three independent

measurements along the z stack were analyzed for each sample. Fluorescence intensity was quantified on ImageJ software and results were analyzed using a t-test.

#### Generating oxidative stress in the brain

To test whether the generation of oxidative stress in the brain could trigger disturbances in other tissues, such as fat body and Malpighian tubules, two mitochondrial genes were independently knocked down in brains. ND42 (NADH dehydrogenase [ubiquinone] 1 alpha subcomplex subunit 10) encodes a subunit of complex I of the mitochondrial electron transport chain and Marf (mitochondrial assembly regulatory factor) encodes a GTPase that mediates outer mitochondrial membrane tethering and fusion. To knockdown these genes UAS ND42 RNAi (BDSC #28894) and UAS Marf RNAi (BDSC #55189) were independently crossed with the neuronal driver Elav-Gal4 (BDSC #8760). UAS Luciferase RNAi (BDSC #31603) was crossed with Elav-Gal4 (BDSC #8760) to provide a control. To measure impacts outside central nervous system the fat bodies and Malpighian tubules were dissected from 10 larvae per group, stained with Nile red before using confocal microscopy to visualize and count the number of lipid droplets (# Evaluation of lipid environment of metabolic tissues in larvae).

#### Evaluation of lipid environment of metabolic tissues in larvae

Fat bodies, midguts and Malpighian tubules were dissected in PBS (Ambion) and subjected to lipid staining with Nile Red N3013 Technical grade (Sigma-Aldrich). For insecticide exposures three biological replicates were performed for each exposure condition. Each replicate consisted of a single tissue from a single larva. A Nile Red stock solution (100 µg/mL in acetone) was prepared. A 10 µg/mL intermediate PBS dilution was used to prepare 1 µg/mL PBS use solution. Tissues were fixed in 4% paraformaldehyde (PFA-Electron Microscopy Science) in PBS for 20 minutes at room temperature. PFA was removed and tissues were washed 3 times in PBS. Samples were stained with 0.5 µg/mL Nile Red/PBS for 20 minutes in dark and agitation and washed 5 times. Slides were mounted in Vectashield (Vector Laboratories) and analyzed using a Leica SP5 Laser Scanning Confocal Microscope at 400x magnification. Red emission was observed with 540 ± 12.5 nm excitation and 590 LP nm emission filters. Images were analyzed using ImageJ software. For fat bodies, the number, size and percentage of area occupied by lipid droplets was measure in 5 different sections, 2500 µm<sup>2</sup> per tissue per section. For Malpighian tubules, the number of lipid droplets was measure in 5 different sections of 900 µm<sup>2</sup> per tissue per replicate. Results were analyzed using t-test.

#### Lipid quantification in larval hemolymph

Extracted hemolymph lipids were measured using the sulfo-phospho-vanillin method. 30 third instar larvae were used for a single biological replicate and 7 replicate samples were prepared for each exposure condition. Larvae were wounded with a sterile needle and placed into a microtube with a hole at the bottom, which was placed inside another microtube and centrifuged for 5 minutes at 9500 rpm. In total 4 µL of hemolymph were collected for each replicate. Hemolymph was dissolved in 100 µL of chloroform/methanol solvent (2:1 ratio). Solvent was evaporated at 95°C for 10 minutes. 100 µL of concentrated sulfuric acid was added and then the solution was incubated for 20 minutes at 95°C. After cooling in ice for two minutes, 500 µL of vanillin reagent (0.2% vanillin in 67% ortho-phosphoric acid) was added. The final reaction absorbance was measured at 540 nm in a CLARIOstar (BMG LABTECH) microplate reader using MARS Data Analysis Software (version 3.10 R3). Cholesterol (Sigma-Aldrich) was used for the preparation of standard curves. Results were analyzed using a t-test.

#### Lipid extraction for LC-MS

Third instar larvae exposed for 2 hr to 2.5 ppm imidacloprid (2.5 ppm DMSO for controls) were transferred to cryomill tubes and frozen in liquid nitrogen. Three biological replicates were prepared for each condition; each replicate was composed of 10 larvae and kept at -80°C until lipid extraction. Larval weight was recorded to normalise lipid quantification. For sample extraction 200 µL of methanol containing 0.001% BHT (butylated hydroxytoluene, an organic lipophilic antioxidant) and 0.01 g/mL 13C5 Valine (IS) were added to each cryomill tube. Samples were subsequently homogenized (three × 45 seconds at 6100 rpm, with 30 seconds rest

between) using a Cryomill (Bertin Technologies) at  $-10^{\circ}\text{C}$ . Then  $400\ \mu\text{L}$  of chloroform was added to each tube and samples were incubated for 15 min at room temperature in a shaker at 1200 rpm. Samples were then centrifuged for 15 minutes, at 13000 rpm at room temperature; the supernatants were removed and transferred to new 1.5 mL microtubes. For a second wash,  $100\ \mu\text{L}$  of methanol (0.001% BHT and 0.01 g/mL 13C5 Valine) and  $200\ \mu\text{L}$  of chloroform were added to cryomill tubes, followed by vortexing and centrifuging as before. Supernatants were transferred to the previous 1.5 mL microtubes.  $300\ \mu\text{L}$  of 0.1 M HCl was added to pooled supernatants, microtubes were then vortexed and centrifuged (15 minutes, room temperature, 13000 rpm). Upper phases (lipid phases) were collected and transferred to clean 1.5 mL microtubes, as well as the lower phases (polar phases). Microtubes with lower phase were washed with  $200\ \mu\text{L}$  of chloroform, centrifuged as before and the new upper phases were transferred to clean 1.5 mL microtubes, whereas the lower phases were combined with the lower phases from previous wash. Once the final upper and lower phases were extracted and sorted in different microtubes,  $50\ \mu\text{L}$  aliquot from each upper phase sample were pooled together to make a PBQC (pooled biological quality control sample). The same was done to create a PBQC from lower phase samples. For each sample,  $300\ \mu\text{L}$  of the lower phase was transferred into glass inserts and dried down then re-suspended in  $100\ \mu\text{L}$  of 50% methanol:water (v/v) for LC-MS analysis. The rest of the lower fractions were transferred to HPLC vials for the LC-MS analysis. Samples from upper phase were dried down in glass inserts for lipid analysis (speed vac at minimum vacuum of 200 bar to avoid chloroform bubbling). Upper phase samples were re-constituted in  $100\ \mu\text{L}$  1:1 buthanol:methanol with 100 mM ammonium formate. All samples were kept at  $-20^{\circ}\text{C}$  until analysis. For LC-MS analysis, microtubes were shaken for 30 minutes at  $30^{\circ}\text{C}$ , then centrifuged at 100rpm for 10 minutes at room temperature after which the supernatants were transferred to LC vials. Extracts were used for lipid analysis as well as for peroxidized lipid analysis.

#### Lipid analysis using LC-MS

Lipids were separated by injecting  $5\ \mu\text{L}$  aliquots of lipid extract onto a  $50\ \text{mm} \times 2.1\ \text{mm} \times 2.7\ \mu\text{m}$  Ascentis Express RP Amide column (Supelco, Sigma, St Louis, USA) at  $35^{\circ}\text{C}$  using an Agilent LC 1200 (Mulgrave, Australia), and eluted at  $0.2\ \text{mLmin}^{-1}$  over a 5 min gradient of water/methanol/tetrahydrofuran (50:20:30, v/v/v) to water/methanol/tetrahydrofuran (5:20:75, v/v/v), with the final buffer held for 3 min. Lipids were analysed by electrospray ionisation-mass spectrometry (ESI-MS) using an Agilent Triple Quad 6410 (Mulgrave, Australia). Lipid species from each class were identified using precursor ion scanning from 100 -1000 m/z, in positive ion mode, phosphatidylcholines (PC, precursors of m/z 184.1), ceramides (CER, m/z 264.6), cholesterol esters (CE, m/z 369.4), phosphatidylglycerols (PG, m/z 189) and in negative ion mode phosphatidylinositols (PI, m/z 241). Neutral loss scanning was used to identify phosphatidylethanolamines (PE, in positive ion mode, neutral loss of m/z 141) and phosphatidylserines (PS, negative ion mode, m/z 87). Diacylglycerol (DG) and Triacylglycerol (TG) species were identified according to the neutral loss of fatty acyl moiety. Identified lipid species were quantified using multiple reaction monitoring (MRM) with a 20 ms dwell time for the simultaneous measurements of ~20 to 50 compounds and the chromatographic peak width of 30 sec to 45 sec, a minimum data points collected across the peak was 12 to 16. Optimised parameters for capillary, fragmentor, and collision voltages were 4000 V, 140 - 380, and 15–60 V, respectively. In all cases, the collision gas was nitrogen at  $7\ \text{Lmin}^{-1}$ . Lipid standards (Avanti Polar Lipids, Alabaster, USA) were prepared by combining equal volumes of individual lipid stock solutions. The standard solution was then diluted to provide a set of calibration solutions ranging in concentration from 0.1 to  $10\ \mu\text{M}$ . Calibration curves were constructed by least squares linear regression, fitting reverse phase peak area of the analyte against the concentration of the lipid in the reference standards. The concentration of each lipid species in the larvae extract samples was estimated by using the regression model to convert normalized peak area to lipid concentration. Detected lipid species were annotated as follows; lipid class (sum of carbon atoms in the two fatty acid chains:sum of double bonds in the fatty acid chains). The LC/MS ESI-MRM data was processed using Agilent MassHunter quantitative software (version 6) (Mulgrave, Australia). For statistical analysis the concentration of lipid compounds was initially normalized to sample weight. We calculated the Principal Components Analysis (PCA) to verify the contribution of each lipid compound in the variance of each treatment. PCA was calculated using the first two

principal component axes. To discriminate the impacts of imidacloprid on the accumulation of specific lipid compounds we performed a One-way ANOVA test with post-hoc Tukey's HSD ( $p < 0.05$ ).

#### Electrophysiology of the retina

Electroretinogram (ERG) recordings (Amplitude and ON transients) from chronically exposed flies were performed as described in (3). In preparation for the ERG adult flies were anesthetized and glued to a glass slide. A reference electrode was inserted in the back of the fly head and the recording electrode was placed on the corneal surface of the eye. Both electrodes were filled with 100 mM NaCl. Flies were maintained in the darkness for at least 5 min prior to a series of 1 s flashes of white light delivered using a halogen lamp. During screening 8 to 10 flies per treatment group were tested. For a given fly, amplitude and ON transient measurements were averaged based on the response to the 3 light flashes. Responses were recorded and analyzed using AxoScope 8.1. Data were analyzed using t-test.

#### Transmission Electron Microscopy (TEM)

Retinas of adult flies chronically exposed for 20 days were processed for TEM imaging as described in (4). Samples were processed using a Ted Pella Bio Wave microwave oven with vacuum attachment. Adult fly heads were dissected at 25 °C in 4 % paraformaldehyde, 2 % glutaraldehyde, and 0.1 M sodium cacodylate (pH 7.2). Samples were subsequently fixed at 4 °C for 48 hr. 1 % osmium tetroxide was used for secondary fixation with subsequent dehydration in ethanol and propylene oxide. Samples were then embedded in Embed-812 resin (Electron Microscopy Science, Hatfield, PA). 50 nm ultra-thin sections were obtained with a Leica UC7 microtome and collected on Formvar-coated copper grids (Electron Microscopy Science, Hatfield, PA). Specimens were stained with 1 % uranyl acetate and 2.5 % lead citrate and imaged using a JEOL JEM 1010 transmission electron microscope with an AMT XR-16 mid-mount 16 mega-pixel CCD camera. For quantification of ultrastructural features, electron micrographs were examined from 3 different animals per treatment. Data were analyzed using a t-test.

### Supplementary Materials and Methods References

1. S. Denecke, C. J. Nowell, A. Fournier-Level, T. Perry, P. Batterham, The wiggle index: An open source bioassay to assess sub-lethal insecticide response in *Drosophila melanogaster*. *PLoS One* **10**, 1–18 (2015).
2. E. Owusu-Ansah, A. Yavari, U. Banerjee, A protocol for in vivo detection of reactive oxygen species. *Nat. Protoc.* doi:10.1038, 1–10 (2008).
3. S. Yamamoto, *et al.*, A *Drosophila* genetic resource of mutants to study mechanisms underlying human genetic diseases. *Cell* **159**, 200–214 (2014).
4. X. Luo, *et al.*, Clinically severe CACNA1A alleles affect synaptic function and neurodegeneration differentially. *PLoS Genet.* **13** (2017).

**A** Imidacloprid increases mitochondria turnover in brain and midgut

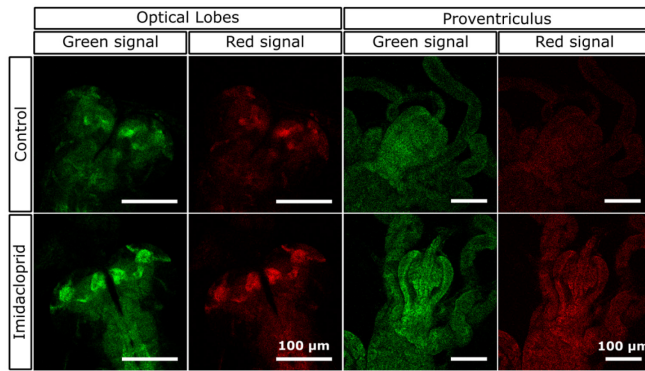

**B**

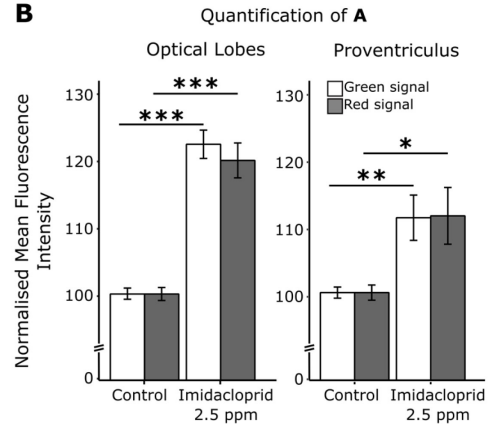

**Fig. S1. Mitochondrial turnover is increased in larvae exposed to 2.5 ppm imidacloprid for 2 hr.** **A**, Optic lobes in the brain and proventriculus of Mitotimer reporter strain larvae. Insecticide exposure increased the signal of healthy (green) and unhealthy (red) mitochondria ( $n = 20$  larvae/treatment; 3 image sections/ larva). Images obtained in Leica SP5 Laser Scanning Confocal Microscope, 200x magnification. **B**, Normalized mean fluorescence intensity. Error bars indicate standard error (t-test; \* $P < 0.05$ ; \*\* $P < 0.01$ ; \*\*\* $P < 0.001$ ).

A 2hr exposure to 2.5 ppm imidacloprid led to an increase of 22% and 20% for the green and red signals in the optical lobes of larval brain, respectively (**Fig. S1A, B**). An 11% increase was observed for both red and green signals in a localized anterior region of the alimentary canal, the proventriculus (**Fig. S1A, B**). That both the red and green signal increase is suggestive of increases in levels of mitochondrial biogenesis and impairment.

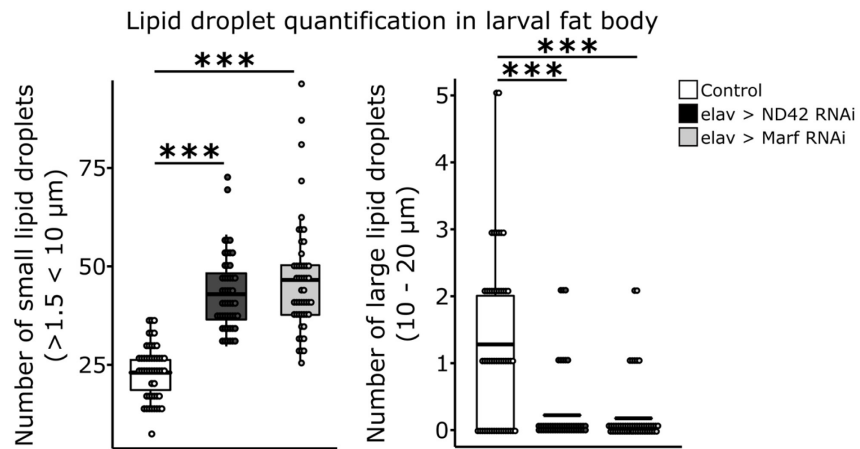

**Fig. S2. Inducing ROS in the brain impacts the lipid environment of metabolic tissues.** Knockdown of genes encoding mitochondrial components ND42 and Marf in neurons affected the LD dynamics in fat body (**Figure 2**). Number of small LDs (> 1.5 μm < 10 μm) (sections of 50 μm x 50 μm), and large LDs (10 μm - 20 μm) (sections of 50 μm x 50 μm) in larval fat bodies. n = 10 larvae/ group; 5 image sections/ larva. (t-test; \*\*\*P < 0.001).



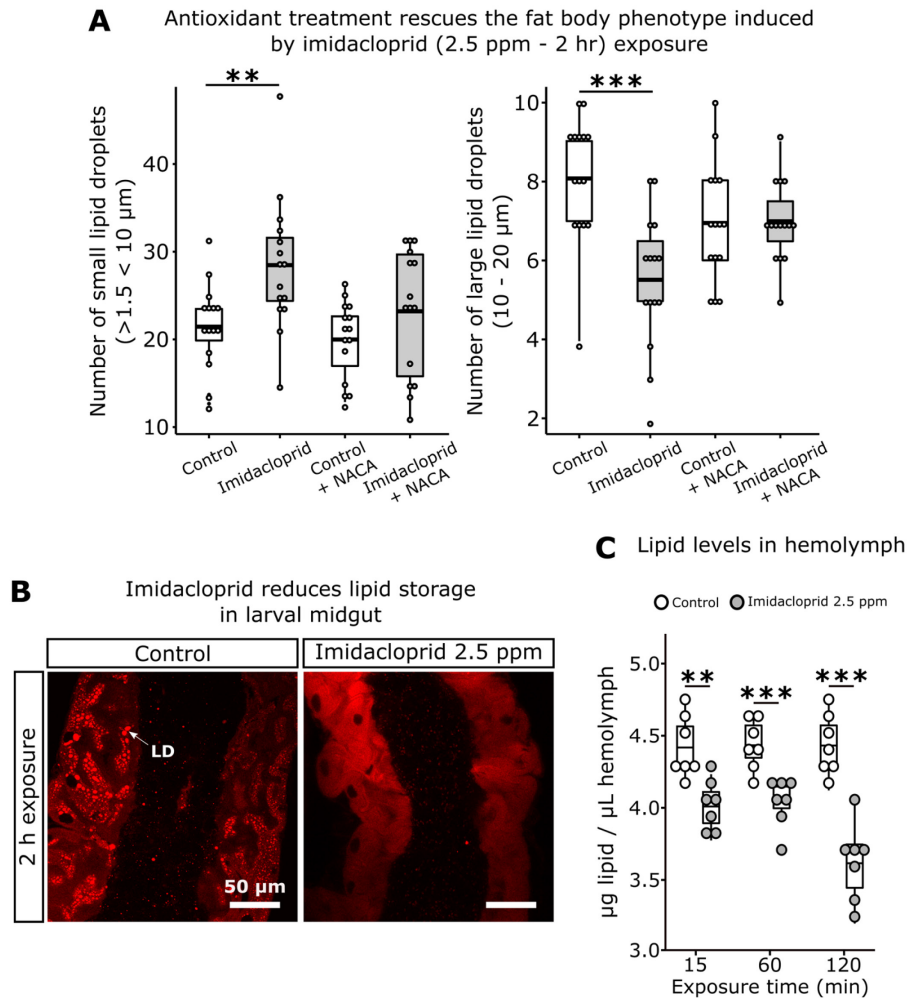

**Fig. S3. Imidacloprid disturbs the lipid environment of different tissues. A,** Larvae treated with 75  $\mu\text{g}/\text{mL}$  of antioxidant NACA for 5 hr prior to a 2 hr exposure to 2.5 ppm imidacloprid show no significant changes in the area occupied by LDs in fat body compared with the control (**Figure 3A**). Number of small LDs (> 1.5  $\mu\text{m}$  < 10  $\mu\text{m}$ ) (sections of 50  $\mu\text{m}$  x 50  $\mu\text{m}$ ), and large LDs (10  $\mu\text{m}$  - 20  $\mu\text{m}$ ) (sections of 50  $\mu\text{m}$  x 50  $\mu\text{m}$ ) in larval fat bodies ( $n = 3$  larvae/ group; 5 image sections/ larva). **B,** Reduced number of LDs in posterior midgut of larvae exposed to imidacloprid. White arrow indicates a LD. Zones with LD accumulation were only found in non-exposed animals ( $n = 3$  larva/ treatment). Nile Red staining, images obtained in Leica SP5 Laser Scanning Confocal Microscope, 400x magnification. **C,** Amount of lipid in hemolymph ( $\mu\text{g}/\mu\text{L}$ ) of larvae exposed to imidacloprid for 15 minutes, 1 hr, or 2 hr measured using the colorimetric vanillin assay ( $n = 8$  replicates/ treatment/ time point; 30 larvae/ replicate). The hemolymph lipid levels are lower in exposed larvae. t-test; \*\* $P < 0.01$ ; \*\*\* $P < 0.001$ .

Treatment with antioxidant improves movement of larvae exposed to imidacloprid

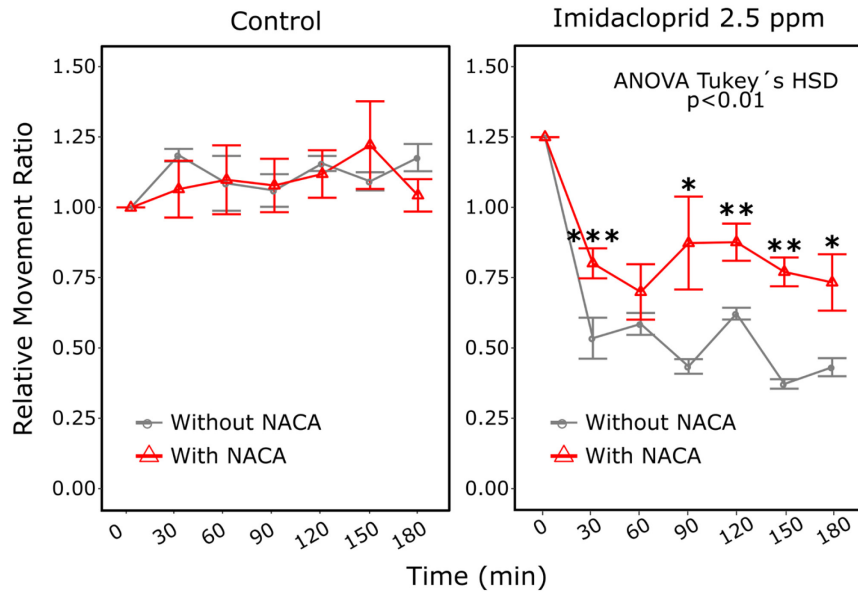

**Fig. S4. Antioxidant treatment ameliorates the impact of imidacloprid on larval movement.** Larvae treated with 75 µg/mL of the antioxidant N-acetylcysteine amide (NACA) for 5 hrs prior to the exposure to 2.5 ppm of imidacloprid. Dose response to insecticide by Wiggle Index analysis. Results are expressed in terms of Relative Movement Ratio (RMR) values over exposure time in minutes (n = 25 flies/ replicate; 4 replicates/ treatment). All points correspond to the mean RMR values with standard error (t-test; \*P < 0.05; \*\*P < 0.01; \*\*\*P < 0.001).

Defective mitochondria in photoreceptor cells in the retina of flies exposed to 4 ppm imidacloprid for 20 days

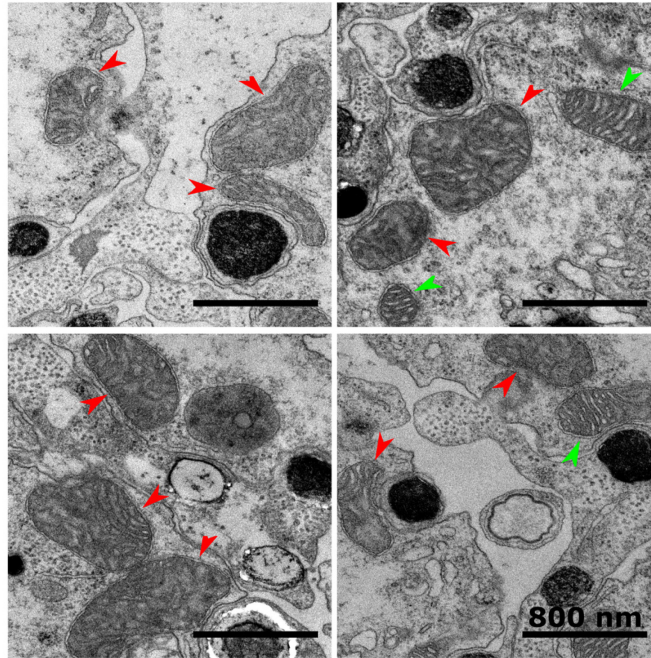

**Fig. S5. Defective mitochondria in photoreceptor cells in the retina of flies exposed to 4 ppm imidacloprid for 20 days.** Red arrowheads point to defective mitochondria, green arrowheads point to normal mitochondria. Transmission electron microscopy, scale bar 800 nm.

**Table S1. Impact of imidacloprid on the lipidomic profile.** Lipidomic profile of larvae exposed to 2.5 ppm imidacloprid or control (equivalent dose of DMSO) for 2 hr as detected by LC-MS. Values are expressed as peak intensity area normalized to sample weight.

| Lipid species                           | Control 1 | Control 2 | Control 3 | Imidacloprid 1 | Imidacloprid 2 | Imidacloprid 3 | ANOVA, Tukey's HSD (p-adj) | F-value |
|-----------------------------------------|-----------|-----------|-----------|----------------|----------------|----------------|----------------------------|---------|
| 2HPOT keto 34:2-PE-<br>/16:0            | 123795.62 | 163589.74 | 219673.91 | 165096.1538    | 181774.1935    | 170781.25      | 0.9065272                  | 0.016   |
| 2HPOT keto 34:2-<br>PG-/16:0            | 90656.9   | 67008.5   | 89021.7   | 88942.3        | 109758.1       | 121328.1       | 0.114785                   | 4.041   |
| 2HPOT keto 34:3-PC-<br>/16:0            | 77372.3   | 33076.9   | 58043.5   | 34326.9        | 39032.3        | 45000          | 0.2738579                  | 1.606   |
| 2HPOT keto 34:3-PE-<br>/16:0            | 933065.69 | 952820.51 | 1215326.1 | 1117980.769    | 1093467.742    | 1306093.75     | 0.2870201                  | 1.506   |
| 2HPOT keto 34:3-<br>PG-/16:0            | 778321.2  | 873846.2  | 713152.2  | 777692.3       | 1070241.9      | 1170000        | 0.1609466                  | 2.951   |
| 2HPOT keto 36:4-PC-<br>/2HPOT keto 36:4 | 754744.5  | 938119.7  | 916087    | 705096.2       | 956612.9       | 1015390.6      | 0.8482946                  | 0.042   |
| 2HPOT keto 36:4-PE-<br>/18:1            | 2131167.9 | 2425726.5 | 2663478.3 | 2619134.615    | 2679596.774    | 2752500        | 0.1559206                  | 3.045   |
| 2HPOT keto 36:4-PE-<br>/18:2            | 1160292   | 1192649.6 | 1200434.8 | 1141346.154    | 1230161.29     | 1948359.375    | 0.3743883                  | 0.998   |
| 2HPOT keto 36:4-<br>PG-/18:1            | 1165255.5 | 1236239.3 | 1200108.7 | 1057115.4      | 1464274.2      | 1623437.5      | 0.3465024                  | 1.136   |
| 2HPOT keto 36:4-<br>PG-/18:2            | 667737.2  | 667435.9  | 531521.7  | 478365.4       | 774838.7       | 1163046.9      | 0.4186368                  | 0.811   |
| 2HPOT keto 36:5-PC-<br>/18:3            | 680438    | 810940.2  | 648260.9  | 747884.6       | 909919.4       | 774218.8       | 0.2399503                  | 1.902   |
| 2HPOT keto 36:5-PE-<br>/18:2            | 488905.11 | 508205.13 | 590434.78 | 453846.1538    | 571370.9677    | 770234.375     | 0.51622                    | 0.506   |
| 2HPOT keto 36:5-<br>PG-/18:2            | 271678.8  | 318461.5  | 243152.2  | 236346.2       | 359354.8       | 552656.3       | 0.329349                   | 1.231   |
| 2HPOT keto 36:6-PC-<br>/18:3            | 51824.8   | 27094     | 31521.7   | 56346.2        | 71371          | 28046.9        | 0.365296                   | 1.041   |
| CE 14:0                                 | 146788.3  | 242136.8  | 283695.7  | 239423.1       | 265967.7       | 197734.4       | 0.8327819                  | 0.051   |
| CE 16:0                                 | 188102.2  | 186153.8  | 236195.7  | 416826.9       | 259112.9       | 56328.1        | 0.7201948                  | 0.148   |
| CE 16:1                                 | 725912.4  | 732393.2  | 986195.7  | 1230096.2      | 502016.1       | 584453.1       | 0.8705959                  | 0.03    |
| CE 18:1                                 | 3085839.4 | 3167435.9 | 3113043.5 | 3411153.8      | 1750887.1      | 2330937.5      | 0.2690833                  | 1.644   |
| CE 18:2                                 | 9927      | 79059.8   | 35978.3   | 24326.9        | 56693.5        | 16406.3        | 0.7174165                  | 0.151   |
| CL 62:3                                 | 37606.838 | 41282.051 | 23152.174 | 15096.15385    | 12903.22581    | 27968.75       | 0.1018561                  | 4.475   |
| CL 64:3                                 | 152820.51 | 159059.83 | 116304.35 | 33365.38462    | 89193.54839    | 81093.75       | 0.02697661                 | 11.64   |
| CL 64:4                                 | 1155726.5 | 1217948.7 | 898260.87 | 330961.5385    | 586532.2581    | 653281.25      | 0.01497685                 | 16.73   |
| CL 64:6                                 | 20341.88  | 18717.949 | 34239.13  | 28365.38462    | 12500          | 17812.5        | 0.5121275                  | 0.516   |
| CL 65:0                                 | 10341.88  | 13589.744 | 11847.826 | 9038.461538    | 5564.516129    | 12031.25       | 0.2186034                  | 2.126   |
| CL 66:0                                 | 12478.632 | 12905.983 | 10000     | 14326.92308    | 9112.903226    | 16484.375      | 0.5575995                  | 0.408   |
| CL 66:3                                 | 101538.46 | 129487.18 | 48152.174 | 8076.923077    | 52258.06452    | 22187.5        | 0.07344596                 | 5.815   |
| CL 66:4                                 | 575811.97 | 634786.32 | 513260.87 | 168076.9231    | 333790.3226    | 461562.5       | 0.05097258                 | 7.605   |
| CL 66:6                                 | 44017.094 | 35470.085 | 30760.87  | 17115.38462    | 21290.32258    | 22734.375      | 0.01799371                 | 14.98   |
| CL 67:0                                 | 123247.86 | 114358.97 | 86413.043 | 40384.61538    | 46612.90323    | 94531.25       | 0.08030337                 | 5.426   |
| CL 68:10                                | 36495.727 | 32649.573 | 34347.826 | 34903.84615    | 18306.45161    | 29843.75       | 0.2475009                  | 1.83    |
| CL 68:11                                | 19743.59  | 23931.624 | 12934.783 | 2884.615385    | 7258.064516    | 546.875        | 0.01520946                 | 16.57   |
| CL 68:3                                 | 24871.795 | 21111.111 | 23913.043 | 20288.46154    | 19193.54839    | 29921.875      | 0.9657504                  | 0.002   |
| CL 68:4                                 | 90854.701 | 82564.103 | 43695.652 | 6730.769231    | 39112.90323    | 28046.875      | 0.05142733                 | 7.557   |
| CL 68:6                                 | 1092222.2 | 1137692.3 | 817934.78 | 150384.6154    | 576774.1935    | 536328.125     | 0.02429935                 | 12.44   |
| CL 69:0                                 | 636495.73 | 660000    | 430108.7  | 55961.53846    | 312903.2258    | 294140.625     | 0.03248173                 | 10.33   |
| CL 70:0                                 | 62136.752 | 79914.53  | 57173.913 | 58076.92308    | 57661.29032    | 69453.125      | 0.5860943                  | 0.35    |
| CL 70:10                                | 111880.34 | 130085.47 | 100326.09 | 101057.6923    | 83629.03226    | 115703.125     | 0.3327475                  | 1.212   |

|                 |           |           |           |             |             |             |             |       |
|-----------------|-----------|-----------|-----------|-------------|-------------|-------------|-------------|-------|
| CL 70:2         | 97179.487 | 114871.79 | 105652.17 | 93365.38462 | 76129.03226 | 113593.75   | 0.389713    | 0.929 |
| CL 70:4         | 5811.9658 | 14102.564 | 13369.565 | 6538.461538 | 9758.064516 | 12421.875   | 0.6541253   | 0.234 |
| CL 70:6         | 113675.21 | 110512.82 | 45760.87  | 12019.23077 | 47741.93548 | 37968.75    | 0.07963051  | 5.426 |
| CL 72:10        | 30427.35  | 39658.12  | 21521.739 | 19230.76923 | 18467.74194 | 27109.375   | 0.2057904   | 2.277 |
| CL 72:11        | 52307.692 | 75555.556 | 58260.87  | 42500       | 33467.74194 | 68906.25    | 0.3403353   | 1.17  |
| CL 72:4         | 214871.79 | 201452.99 | 188913.04 | 156346.1538 | 147338.7097 | 182265.625  | 0.03663744  | 9.537 |
| CL 74:7         | 100341.88 | 94957.265 | 50217.391 | 47596.15385 | 41935.48387 | 74218.75    | 0.2196609   | 2.114 |
| DG 28:0 -(14:0) | 41232263  | 43517778  | 56964783  | 114516730.8 | 45045403.2  | 100118593.8 | 0.1446323   | 3.274 |
| DG 30:0 -(14:0) | 20333869  | 16738120  | 33330544  | 27939134.6  | 21435967.7  | 8719296.9   | 0.6164652   | 0.294 |
| DG 30:0 -(15:0) | 222116.8  | 189145.3  | 224782.6  | 59038.5     | 111371      | 103125      | 0.003702807 | 36.94 |
| DG 30:0 -(16:0) | 31792482  | 28049829  | 52891848  | 42590000    | 32173951.6  | 24357265.6  | 0.6533128   | 0.235 |
| DG 30:1 -(14:0) | 112222774 | 95524615  | 144444891 | 137996153.8 | 101023871   | 88472812.5  | 0.7106886   | 0.159 |
| DG 30:1 -(14:1) | 13757883  | 11986325  | 20162065  | 13815673.1  | 11538951.6  | 11552421.9  | 0.3121899   | 1.335 |
| DG 30:1 -(16:0) | 12133212  | 11247180  | 18532283  | 13936923.1  | 10795564.5  | 9536562.5   | 0.3894348   | 0.93  |
| DG 30:1 -(16:1) | 141050292 | 119525299 | 179823044 | 175566250   | 121591935.5 | 108164687.5 | 0.6886004   | 0.186 |
| DG 32:0 -(14:0) | 1981678.8 | 2075042.7 | 2994347.8 | 3262019.2   | 2035725.8   | 1740156.3   | 0.994194    | 0     |
| DG 32:0 -(16:0) | 28784891  | 24649402  | 42998804  | 43127980.8  | 26091612.9  | 21555937.5  | 0.8372062   | 0.048 |
| DG 32:0 -(18:0) | 4620875.9 | 3709059.8 | 6845978.3 | 6698846.2   | 4243790.3   | 4440625     | 0.9575369   | 0.003 |
| DG 32:1 -(14:0) | 119655329 | 117577436 | 153631848 | 155256442.3 | 106307903.2 | 96085390.6  | 0.636464    | 0.261 |
| DG 32:1 -(14:1) | 1084744.5 | 1191111.1 | 2034456.5 | 1517211.5   | 1253467.7   | 937187.5    | 0.5907516   | 0.341 |
| DG 32:1 -(16:0) | 93221387  | 88162821  | 125805978 | 126053750   | 84295887.1  | 77518359.4  | 0.7543883   | 0.112 |
| DG 32:1 -(16:1) | 112397080 | 104677350 | 148316522 | 151328076.9 | 99041774.2  | 91196406.3  | 0.7490657   | 0.117 |
| DG 32:1 -(18:0) | 892335.8  | 1543418.8 | 2525978.3 | 2264423.1   | 1165161.3   | 1734687.5   | 0.9116005   | 0.014 |
| DG 32:1 -(18:1) | 137173577 | 129496667 | 183220326 | 181773942.3 | 121549596.8 | 107640468.8 | 0.6700384   | 0.211 |
| DG 32:2 -(14:0) | 8099197.1 | 7010427.4 | 9596304.3 | 7751923.1   | 5868709.7   | 8843437.5   | 0.5504082   | 0.424 |
| DG 32:2 -(14:1) | 16463504  | 14628974  | 23230109  | 17034807.7  | 14066693.5  | 12871640.6  | 0.2990523   | 1.421 |
| DG 32:2 -(16:1) | 204709270 | 186125812 | 293435000 | 250646442.3 | 200716048.4 | 165087421.9 | 0.613857    | 0.299 |
| DG 32:2 -(18:1) | 13110438  | 11873162  | 17568261  | 15491538.5  | 12767983.9  | 11868359.4  | 0.7127766   | 0.156 |
| DG 32:2 -(18:2) | 12836788  | 11616068  | 18780326  | 12521826.9  | 11220080.6  | 13048437.5  | 0.3992975   | 0.888 |
| DG 34:0 -(14:0) | 180729.9  | 139743.6  | 273369.6  | 293942.3    | 125887.1    | 147656.3    | 0.9004185   | 0.018 |
| DG 34:0 -(16:0) | 5460729.9 | 4198547   | 7729239.1 | 6830096.2   | 4721935.5   | 4397734.4   | 0.7277024   | 0.14  |
| DG 34:0 -(18:0) | 6165255.5 | 4886837.6 | 9138369.6 | 9939519.2   | 4819677.4   | 4652890.6   | 0.9095122   | 0.015 |
| DG 34:0 -(20:0) | 236496.4  | 342649.6  | 233587    | 438942.3    | 121693.5    | 31093.8     | 0.5978174   | 0.327 |
| DG 34:1 -(16:1) | 9410802.9 | 5651282.1 | 12105761  | 11474230.8  | 5501612.9   | 7322656.3   | 0.7290748   | 0.138 |
| DG 34:1 -(18:0) | 7627445.3 | 4759401.7 | 7893369.6 | 10085576.9  | 6521774.2   | 5677734.4   | 0.7115175   | 0.158 |
| DG 34:1 -(18:1) | 167782993 | 140669658 | 246624239 | 211294615.4 | 158396532.3 | 124938906.3 | 0.6450908   | 0.247 |
| DG 34:1 -(20:0) | 131751.8  | 324615.4  | 272826.1  | 117884.6    | 342580.6    | 183203.1    | 0.7626448   | 0.105 |
| DG 34:2 -(16:0) | 8007518.2 | 6161880.3 | 9911739.1 | 6500288.5   | 5472500     | 6101875     | 0.1492177   | 3.178 |
| DG 34:2 -(16:1) | 84736861  | 76823846  | 118052283 | 107352307.7 | 75306451.6  | 65580703.1  | 0.5895332   | 0.343 |
| DG 34:2 -(18:1) | 139355183 | 128887265 | 202773261 | 186866057.7 | 131831935.5 | 110240000   | 0.6878778   | 0.187 |
| DG 34:2 -(18:2) | 10302044  | 8617435.9 | 13534022  | 9174423.1   | 8951935.5   | 9436406.3   | 0.3235876   | 1.265 |

|                             |           |           |           |            |            |            |            |       |
|-----------------------------|-----------|-----------|-----------|------------|------------|------------|------------|-------|
| DG 36:0 -(16:0)             | 188102.2  | 186153.8  | 236195.7  | 416826.9   | 259112.9   | 52890.6    | 0.7301063  | 0.137 |
| DG 36:0 -(18:0)             | 1768759.1 | 1696837.6 | 2512173.9 | 1986057.7  | 1312741.9  | 1251875    | 0.2469064  | 1.836 |
| DG 36:0 -(20:0)             | 269416.1  | 275213.7  | 423804.3  | 373557.7   | 182661.3   | 132343.8   | 0.3544919  | 1.095 |
| DG 36:1 -(16:1)             | 725912.4  | 732393.2  | 986195.7  | 1262115.4  | 502016.1   | 584453.1   | 0.9064899  | 0.016 |
| DG 36:1 -(18:0)             | 8194452.6 | 3938803.4 | 14448696  | 13465000   | 7254677.4  | 5233515.6  | 0.9600325  | 0.003 |
| DG 36:1 -(18:1)             | 10549781  | 11541026  | 15197283  | 15181250   | 10267096.8 | 7618593.8  | 0.6207398  | 0.287 |
| DG 36:1 -(20:0)             | 800875.9  | 728547    | 360000    | 958750     | 668629     | 473828.1   | 0.7371453  | 0.13  |
| DG 36:2 -(18:0)             | 999051.1  | 484017.1  | 1448913   | 1169134.6  | 611290.3   | 1012031.3  | 0.8929574  | 0.021 |
| DG 36:2 -(18:1)             | 37264964  | 35416752  | 49351413  | 51339230.8 | 31780887.1 | 29779531.3 | 0.7276272  | 0.14  |
| DG 36:2 -(18:2)             | 800583.9  | 786752.1  | 1056195.7 | 785480.8   | 846209.7   | 859453.1   | 0.6046068  | 0.315 |
| DG 36:3 -(16:0)             | 12043.8   | 25555.6   | 0         | 0          | 0          | 16640.6    | 0.491381   | 0.573 |
| DG 36:3 -(18:0)             | 146131.4  | 88547     | 71630.4   | 16346.2    | 107822.6   | 46093.8    | 0.2663152  | 1.666 |
| DG 36:3 -(18:1)             | 4758467.2 | 4183418.8 | 4991304.3 | 4005961.5  | 3206612.9  | 3770781.3  | 0.04352331 | 8.489 |
| DG 36:3 -(18:2)             | 5452335.8 | 4341111.1 | 6264891.3 | 6278076.9  | 3778629    | 4492578.1  | 0.617006   | 0.293 |
| DG 36:3 -(18:3)             | 128686.1  | 168803.4  | 82173.9   | 173653.8   | 183871     | 129921.9   | 0.2972519  | 1.434 |
| DG 36:4 -(18:1)             | 304452.6  | 177265    | 181304.3  | 287980.8   | 85887.1    | 119921.9   | 0.494508   | 0.564 |
| DG 36:4 -(18:2)             | 1052992.7 | 797008.5  | 930652.2  | 282019.2   | 749758.1   | 1145000    | 0.4822437  | 0.599 |
| DG 36:4 -(18:3)             | 409051.1  | 301965.8  | 489565.2  | 439230.8   | 365483.9   | 291093.8   | 0.6400569  | 0.255 |
| DG 38:1 -(18:1)             | 3085839.4 | 3167435.9 | 3113043.5 | 3411153.8  | 1750887.1  | 2330937.5  | 0.2690833  | 1.644 |
| DG 38:1 -(20:0)             | 680948.9  | 401367.5  | 922391.3  | 605961.5   | 679193.5   | 470703.1   | 0.636519   | 0.261 |
| DG 38:4 -(20:3)             | 27226.3   | 15042.7   | 17391.3   | 15384.6    | 85887.1    | 5000       | 0.5778294  | 0.366 |
| DG 38:5 -(16:0)             | 14306.6   | 28290.6   | 27826.1   | 24519.2    | 11935.5    | 6953.1     | 0.2649846  | 1.677 |
| DG 38:5 -(20:3)             | 166642.3  | 108803.4  | 97826.1   | 113461.5   | 148790.3   | 152343.8   | 0.6066816  | 0.311 |
| DG 38:5 -(22:5)             | 47080.3   | 27179.5   | 35760.9   | 64326.9    | 73387.1    | 57890.6    | 0.01749149 | 15.24 |
| DG 38:6 -(16:0)             | 464525.5  | 914359    | 253152.2  | 1140288.5  | 916129     | 259687.5   | 0.5256447  | 0.482 |
| DG 38:6 -(22:5)             | 7299.3    | 20341.9   | 49021.7   | 12019.2    | 6048.4     | 0          | 0.2017883  | 2.328 |
| dhCer 16:0                  | 259416.1  | 110427.4  | 237826.1  | 295769.2   | 68548.4    | 275390.6   | 0.9073678  | 0.015 |
| dhCer 18:0                  | 27810.2   | 26410.3   | 13152.2   | 81730.8    | 21854.8    | 45000      | 0.2079963  | 2.25  |
| dhCer 20:0                  | 18832.1   | 47350.4   | 2934.8    | 14519.2    | 14516.1    | 0          | 0.3898028  | 0.929 |
| HOD 34:2-PC-/16:0           | 874160.6  | 350854.7  | 220869.6  | 363173.1   | 205483.9   | 339140.6   | 0.432224   | 0.761 |
| HOD 34:3-PC-/16:0           | 20799051  | 20560769  | 20739457  | 20967596.2 | 18727661.3 | 21112734.4 | 0.6083498  | 0.308 |
| HOD 34:3-PE-/16:0           | 50000     | 66581.2   | 12608.7   | 8461.5     | 66451.6    | 85000      | 0.7334211  | 0.133 |
| HOD 34:3-PG-/HOT<br>34:2 PG | 163503.6  | 172051.3  | 45434.8   | 70865.4    | 240080.6   | 344218.8   | 0.3650133  | 1.042 |
| HOD 36:4-PC-/18:1           | 1337518.2 | 1207777.8 | 1465108.7 | 1142596.2  | 1130080.6  | 1591406.3  | 0.7871519  | 0.083 |
| HOD 36:4-PC-/18:2           | 1069854   | 672393.2  | 978478.3  | 1150192.3  | 759112.9   | 1247500    | 0.490348   | 0.575 |
| HOD 36:4-PE-/18:1           | 55401.5   | 81794.9   | 18260.9   | 34423.1    | 108225.8   | 121093.8   | 0.3314895  | 1.219 |
| HOD 36:4-PG-/18:1           | 643211.7  | 651453    | 213913    | 293750     | 803871     | 990312.5   | 0.4884876  | 0.581 |
| HOD 36:5-PC-/18:2           | 5985.4    | 4529.9    | 652.2     | 5096.2     | 1048.4     | 4687.5     | 0.9590547  | 0.003 |
| HOD 36:5-PC-/18:3           | 374890.5  | 550256.4  | 403260.9  | 469423.1   | 607258.1   | 570156.3   | 0.1945369  | 2.423 |
| HOD 36:5-PG-/HOT<br>36:4 PG | 89854     | 52564.1   | 37391.3   | 36730.8    | 90645.2    | 109062.5   | 0.51888    | 0.499 |
| HOD 36:6-PC-/18:3           | 301824.8  | 122478.6  | 134239.1  | 88557.7    | 118871     | 233046.9   | 0.6171649  | 0.293 |

|                                          |           |           |           |             |             |            |             |       |
|------------------------------------------|-----------|-----------|-----------|-------------|-------------|------------|-------------|-------|
| HOT 34:2-PC-/16:0                        | 16493723  | 19311880  | 20449348  | 20967596.2  | 14758467.7  | 8265859.4  | 0.3483035   | 1.127 |
| HOT 34:3-PC-/16:0                        | 16770073  | 16078120  | 16163696  | 15545673.1  | 14276371    | 18657031.3 | 0.8994234   | 0.018 |
| HOT 34:3-PG-/16:0                        | 66058.394 | 80000     | 24239.13  | 43173.07692 | 131370.9677 | 146406.25  | 0.2387063   | 1.914 |
| HOT 36:4-PC-/18:1                        | 24306.569 | 25555.556 | 11847.826 | 15673.07692 | 31935.48387 | 26875      | 0.5481246   | 0.429 |
| HOT 36:4-PC-/18:2                        | 374890.5  | 550256.4  | 403260.9  | 469423.1    | 607258.1    | 570156.3   | 0.1945369   | 2.423 |
| HOT 36:4-PG-/18:1                        | 175328.47 | 196410.26 | 52608.696 | 79134.61538 | 212096.7742 | 238671.875 | 0.6256169   | 0.278 |
| HOT 36:5-PG-/oPDA<br>36:4 PG             | 21532.8   | 28119.7   | 5978.3    | 1538.5      | 18709.7     | 3828.1     | 0.2830665   | 1.535 |
| HOT 36:6-PC-/18:3                        | 48686.1   | 50000     | 47065.2   | 21153.8     | 34677.4     | 21171.9    | 0.007495624 | 24.99 |
| HPOD keto 34:2-PC-<br>/16:0              | 34817.5   | 111025.6  | 36847.8   | 33461.5     | 62016.1     | 72968.8    | 0.8722163   | 0.029 |
| HPOD keto 34:2-PC-<br>/16:0              | 172627.7  | 164188    | 222826.1  | 154038.5    | 238548.4    | 249296.9   | 0.4801317   | 0.605 |
| HPOD keto 34:2-PE-<br>/16:0              | 75109.5   | 98717.9   | 65326.1   | 93173.1     | 84838.7     | 89921.9    | 0.4003391   | 0.884 |
| HPOD keto 34:2-PG-<br>/16:0              | 39416.1   | 43076.9   | 21847.8   | 26923.1     | 33709.7     | 33906.3    | 0.6624345   | 0.221 |
| HPOD keto 34:3-PC-<br>/16:0              | 6820073   | 6517350.4 | 5980000   | 5741057.7   | 6025725.8   | 6015781.3  | 0.1233615   | 3.791 |
| HPOD keto 34:3-PC-<br>/16:0              | 660802.9  | 655982.9  | 600760.9  | 556826.9    | 821129      | 1137265.6  | 0.3035019   | 1.392 |
| HPOD keto 34:3-PC-<br>/18:3              | 2117226.3 | 2741880.3 | 4474565.2 | 3675865.4   | 1355161.3   | 4686562.5  | 0.9210131   | 0.011 |
| HPOD keto 34:3-PE-<br>/HPOT keto 34:2 PE | 627591.2  | 662735    | 574130.4  | 575480.8    | 792822.6    | 816875     | 0.257241    | 1.743 |
| HPOD keto 34:3-PG-<br>/16:0              | 537591.24 | 621196.58 | 576847.83 | 729807.6923 | 662177.4194 | 728281.25  | 0.01752741  | 15.22 |
| HPOD keto 36:4-PC-<br>/18:1              | 2698686.1 | 1997948.7 | 2249891.3 | 1623365.4   | 2136532.3   | 2636250    | 0.6344728   | 0.264 |
| HPOD keto 36:4-PC-<br>/18:1              | 459416.1  | 482991.5  | 421739.1  | 433846.2    | 455806.5    | 748828.1   | 0.4251614   | 0.787 |
| HPOD keto 36:4-PC-<br>/18:2              | 1645985.4 | 1309743.6 | 1104565.2 | 515192.3    | 1307096.8   | 1726015.6  | 0.6831533   | 0.193 |
| HPOD keto 36:4-PC-<br>/18:2              | 262408.8  | 321709.4  | 255108.7  | 204326.9    | 389112.9    | 459062.5   | 0.4182887   | 0.813 |
| HPOD keto 36:4-PE-<br>/18:1              | 724671.5  | 889572.6  | 579565.2  | 690096.2    | 858629      | 783515.6   | 0.6743194   | 0.205 |
| HPOD keto 36:4-PE-<br>/18:2              | 232992.7  | 253589.7  | 254782.6  | 256346.2    | 265322.6    | 331953.1   | 0.2069389   | 2.263 |
| HPOD keto 36:4-PE-<br>/18:3              | 138832.12 | 154786.32 | 113913.04 | 111250      | 115080.6452 | 173203.125 | 0.9144434   | 0.013 |
| HPOD keto 36:4-PG-<br>/18:1              | 565328.47 | 751623.93 | 824673.91 | 805288.4615 | 872903.2258 | 748593.75  | 0.3268752   | 1.246 |
| HPOD keto 36:4-PG-<br>/18:2              | 153868.61 | 155128.21 | 189130.43 | 138653.8462 | 199919.3548 | 304921.875 | 0.3865296   | 0.943 |
| HPOD keto 36:5-PC-<br>/18:2              | 252700.7  | 283247.9  | 224782.6  | 211730.8    | 282983.9    | 413125     | 0.4687603   | 0.639 |
| HPOD keto 36:5-PC-<br>/18:3              | 3274233.6 | 2904786.3 | 2831630.4 | 2173269.2   | 2315725.8   | 3266796.9  | 0.3209553   | 1.281 |
| HPOD keto 36:5-PC-<br>/18:3              | 24598.5   | 28461.5   | 20000     | 33269.2     | 19193.5     | 39453.1    | 0.3866157   | 0.942 |
| HPOD keto 36:5-PE-<br>/18:3              | 49927.007 | 57777.778 | 56956.522 | 31826.92308 | 90887.09677 | 73437.5    | 0.5849512   | 0.352 |
| HPOD keto 36:5-PE-<br>/HPOT keto 36:4 PE | 254525.5  | 265384.6  | 203478.3  | 201826.9    | 254677.4    | 430468.8   | 0.4892982   | 0.578 |
| HPOD keto 36:5-PG-<br>/18:2              | 259562.04 | 325982.91 | 254021.74 | 302884.6154 | 316935.4839 | 437890.625 | 0.2096325   | 2.23  |
| HPOD keto 36:6-PC-<br>/18:3              | 947080.3  | 694871.8  | 864673.9  | 770480.8    | 701935.5    | 1219687.5  | 0.7465773   | 0.12  |
| HPOT keto 34:2-PC-<br>/16:0              | 660802.9  | 655982.9  | 600760.9  | 556826.9    | 821129      | 1137265.6  | 0.3035019   | 1.392 |
| HPOT keto 34:2-PG-<br>/16:0              | 526934.31 | 618632.48 | 576847.83 | 732500      | 682580.6452 | 732031.25  | 0.01058198  | 20.52 |
| HPOT keto 34:3-PC-<br>/16:0              | 53047518  | 49862906  | 44425326  | 41148942.3  | 48108387.1  | 52577500   | 0.682885    | 0.193 |
| HPOT keto 34:3-PC-<br>/16:0              | 117299.3  | 132307.7  | 78478.3   | 62596.2     | 138387.1    | 180000     | 0.6661597   | 0.216 |
| HPOT keto 34:3-PE-<br>/16:0              | 25839.416 | 28547.009 | 47934.783 | 22596.15385 | 64919.35484 | 60859.375  | 0.36885     | 1.024 |
| HPOT keto 34:3-PG-<br>/16:0              | 151240.88 | 178034.19 | 220652.17 | 208942.3077 | 206451.6129 | 221875     | 0.2335822   | 1.965 |
| HPOT keto 36:4-PC-<br>/18:1              | 193795.6  | 193418.8  | 154239.1  | 117307.7    | 195645.2    | 294609.4   | 0.6986443   | 0.173 |
| HPOT keto 36:4-PC-<br>/18:2              | 3274233.6 | 2904786.3 | 1378804.3 | 422019.2    | 2315725.8   | 1617656.3  | 0.2536904   | 1.774 |

|                             |           |           |           |             |             |             |            |       |
|-----------------------------|-----------|-----------|-----------|-------------|-------------|-------------|------------|-------|
| HPOT keto 36:4-PE-<br>/18:1 | 56861.314 | 53076.923 | 55869.565 | 40192.30769 | 55483.87097 | 88515.625   | 0.6904244  | 0.184 |
| HPOT keto 36:4-PG-<br>/18:1 | 261970.8  | 358888.89 | 328695.65 | 320192.3077 | 400725.8065 | 352265.625  | 0.327596   | 1.242 |
| HPOT keto 36:4-PG-<br>/18:2 | 144452.55 | 310940.17 | 125326.09 | 157692.3077 | 195645.1613 | 369218.75   | 0.618918   | 0.29  |
| HPOT keto 36:5-PG-<br>/18:2 | 35839.416 | 57521.368 | 42934.783 | 20288.46154 | 56693.54839 | 62500       | 0.9457594  | 0.005 |
| HPOT keto 36:6-PC-<br>/18:3 | 34525.5   | 48974.4   | 30108.7   | 3461.5      | 31290.3     | 27734.4     | 0.1778365  | 2.666 |
| LPC 13:0                    | 49416.1   | 163675.2  | 314565.2  | 191730.8    | 75887.1     | 133125      | 0.6400351  | 0.255 |
| LPC 14:0                    | 8076642.3 | 4993162.4 | 14069457  | 10941538.5  | 6463387.1   | 6693593.8   | 0.7552877  | 0.111 |
| LPC 15:0                    | 746496.4  | 650170.9  | 1462826.1 | 1036923.1   | 539274.2    | 793593.8    | 0.6081647  | 0.309 |
| LPC 16:0                    | 14026788  | 10416923  | 20962717  | 16870480.8  | 8984919.4   | 11537109.4  | 0.5279266  | 0.477 |
| LPC 16:1                    | 39893796  | 28366752  | 63312174  | 53965096.2  | 27167983.9  | 31067734.4  | 0.6515142  | 0.238 |
| LPC 18:0                    | 1140583.9 | 729145.3  | 1611195.7 | 1163173.1   | 510645.2    | 776406.3    | 0.3401147  | 1.171 |
| LPC 18:1                    | 39195839  | 26416581  | 60837391  | 51469038.5  | 25766612.9  | 28421796.9  | 0.620696   | 0.287 |
| LPC 18:2                    | 14800365  | 10596752  | 18063478  | 15866057.7  | 8931048.4   | 12340234.4  | 0.5138633  | 0.512 |
| LPC 18:3                    | 392700.7  | 422991.5  | 452391.3  | 712884.6    | 400161.3    | 160859.4    | 0.9909462  | 0     |
| LPC 20:0                    | 15401.5   | 25470.1   | 14565.2   | 43076.9     | 75564.5     | 84375       | 0.01955038 | 14.24 |
| LPC 20:1                    | 97153.3   | 23333.3   | 20326.1   | 27019.2     | 53064.5     | 45156.3     | 0.8530452  | 0.039 |
| LPC 20:2                    | 16569.3   | 9230.8    | 16847.8   | 12596.2     | 19838.7     | 63750       | 0.3318111  | 1.217 |
| LPC 20:3                    | 27956.2   | 28034.2   | 16521.7   | 8846.2      | 22983.9     | 26328.1     | 0.5075717  | 0.528 |
| LPC 20:5                    | 5839.4    | 72649.6   | 21739.1   | 9615.4      | 0           | 18437.5     | 0.3126247  | 1.333 |
| LPC 22:1                    | 20146     | 9658.1    | 34565.2   | 23461.5     | 12903.2     | 20468.8     | 0.7656736  | 0.102 |
| LPC 22:6                    | 9635      | 16410.3   | 19891.3   | 25000       | 1693.5      | 0           | 0.4976534  | 0.555 |
| LPC 26:0                    | 135328.5  | 96495.7   | 0         | 99711.5     | 0           | 88593.8     | 0.7906898  | 0.081 |
| LPC(O-16:0)                 | 406204.4  | 106495.7  | 664021.7  | 761250      | 235806.5    | 486796.9    | 0.6676876  | 0.214 |
| LPC(O-18:0)                 | 344744.5  | 134871.8  | 777065.2  | 531442.3    | 243951.6    | 201796.9    | 0.6878912  | 0.187 |
| LPC(O-18:1)                 | 344890.5  | 322051.3  | 674565.2  | 439903.8    | 255080.6    | 386953.1    | 0.5314136  | 0.468 |
| LPC(O-20:1)                 | 145839.4  | 77692.3   | 196304.3  | 175769.2    | 65806.5     | 147031.3    | 0.8375785  | 0.048 |
| LPC(O-24:2)                 | 94379.6   | 58205.1   | 67608.7   | 68557.7     | 32822.6     | 74375       | 0.4306657  | 0.767 |
| LPE(14:0)                   | 1097737.2 | 777094    | 1574673.9 | 815673.1    | 1118387.1   | 1215312.5   | 0.7210949  | 0.147 |
| LPE(16:0)                   | 24217007  | 19993504  | 26377500  | 22880288.5  | 16988871    | 18787656.3  | 0.1952422  | 2.414 |
| LPE(18:0)                   | 3360438   | 2230769.2 | 3450869.6 | 2034134.6   | 2117338.7   | 985546.9    | 0.07189622 | 5.91  |
| LPE(18:1)                   | 37572555  | 32011197  | 50273696  | 43582596.2  | 28193871    | 30753593.8  | 0.4675249  | 0.643 |
| LPE(18:2)                   | 5296277.4 | 4930341.9 | 6888587   | 7194230.8   | 4311532.3   | 5856406.3   | 0.9399711  | 0.006 |
| M34:2-PC-/16:0              | 395180876 | 363748034 | 351048261 | 332364134.6 | 355669758.1 | 409978671.9 | 0.8875373  | 0.023 |
| M34:2-PC-/16:0              | 394306.57 | 407094.02 | 522282.61 | 448846.1538 | 417661.2903 | 634687.5    | 0.4956493  | 0.561 |
| M34:2-PC-/18:2              | 1160292   | 1162991.5 | 1193260.9 | 1134038.462 | 1230161.29  | 1948359.375 | 0.3604301  | 1.065 |
| M34:2-PE-/16:0              | 428978.1  | 411452.99 | 599347.83 | 536153.8462 | 543870.9677 | 675078.125  | 0.2336303  | 1.965 |
| M34:2-PE-/18:2              | 431970.8  | 490854.7  | 535434.78 | 596538.4615 | 598225.8065 | 730078.125  | 0.04363361 | 8.474 |
| M34:2-PG-/16:0              | 87080.3   | 50598.3   | 86087     | 50192.3     | 79758.1     | 133750      | 0.6507248  | 0.239 |
| M34:2-PG-/18:2              | 84525.5   | 75897.4   | 59456.5   | 62403.8     | 91854.8     | 135390.6    | 0.3585377  | 1.074 |
| M34:3-PC-/16:0              | 205288248 | 179579316 | 164971304 | 147003076.9 | 174619112.9 | 242252500   | 0.8860663  | 0.023 |
| M34:3-PE-/16:0              | 31751.825 | 14102.564 | 43260.87  | 27115.38462 | 36048.3871  | 55625       | 0.4543207  | 0.685 |



|                    |           |           |           |             |             |             |            |       |
|--------------------|-----------|-----------|-----------|-------------|-------------|-------------|------------|-------|
| M36:4-PC-/18:1     | 39896058  | 35002821  | 33049022  | 26358557.7  | 31632903.2  | 53491640.6  | 0.8970629  | 0.019 |
| M36:4-PC-/18:2     | 332481.75 | 404358.97 | 355434.78 | 311057.6923 | 325645.1613 | 709843.75   | 0.5565416  | 0.411 |
| M36:4-PE-/18:2     | 489416.06 | 420000    | 553913.04 | 417692.3077 | 466935.4839 | 738593.75   | 0.6445739  | 0.248 |
| M36:4-PG-/18:2     | 39708     | 70683.8   | 51304.3   | 33173.1     | 60241.9     | 135078.1    | 0.5222382  | 0.491 |
| M36:5-PC-/18:3     | 2145036.5 | 1607948.7 | 1478695.7 | 1056634.6   | 1535564.5   | 2535156.3   | 0.945831   | 0.005 |
| M36:6-PC-/18:3     | 26277.4   | 21453     | 5543.5    | 30673.1     | 33387.1     | 6093.8      | 0.6269439  | 0.276 |
| modPC 540.5/0.78   | 92481.8   | 23418.8   | 154347.8  | 58461.5     | 22822.6     | 7109.4      | 0.2111002  | 2.213 |
| modPC 666.4/1.90   | 46058.4   | 71282.1   | 126413    | 55192.3     | 55645.2     | 127031.3    | 0.9563193  | 0.003 |
| modPC 843.6/7.10   | 3430.7    | 17265     | 20108.7   | 34423.1     | 14193.5     | 13906.3     | 0.4435579  | 0.721 |
| oddPC 29:0         | 10380073  | 9096923.1 | 10458044  | 9726634.6   | 8943709.7   | 9653359.4   | 0.3491653  | 1.122 |
| oddPC 31:0         | 25436788  | 24147863  | 24158913  | 23461634.6  | 21318709.7  | 22074765.6  | 0.03903004 | 9.141 |
| oddPC 31:1         | 66959489  | 67651880  | 65388370  | 55181250    | 62067338.7  | 63983125    | 0.08566317 | 5.156 |
| oddPC 33:0         | 6205985.4 | 6853675.2 | 7004782.6 | 6891923.1   | 5202983.9   | 5678437.5   | 0.243886   | 1.864 |
| oddPC 33:1         | 66628613  | 67228889  | 62993696  | 66121538.5  | 55719193.5  | 60257031.3  | 0.2091639  | 2.236 |
| oddPC 33:2         | 42559051  | 42484274  | 38779783  | 35635480.8  | 34974758.1  | 43585625    | 0.3499738  | 1.118 |
| oddPC 33:3         | 4135255.5 | 3081453   | 3306304.3 | 2647884.6   | 3446371     | 0           | 0.2469712  | 1.835 |
| oddPC 35:1         | 20165620  | 21617180  | 21501196  | 20525961.5  | 18299112.9  | 18380312.5  | 0.07920856 | 5.485 |
| oddPC 35:3         | 7914817.5 | 8185128.2 | 7362500   | 4861923.1   | 5697419.4   | 10053828.1  | 0.5908673  | 0.34  |
| oddPC 35:4         | 474233.6  | 471623.9  | 595543.5  | 239230.8    | 420241.9    | 1050703.1   | 0.8325308  | 0.051 |
| oddPC 35:5         | 112481.8  | 20427.4   | 53369.6   | 27884.6     | 59596.8     | 102265.6    | 0.9748668  | 0.001 |
| oddPC 37:4         | 176350.4  | 205384.6  | 149239.1  | 348846.2    | 161854.8    | 241406.3    | 0.262396   | 1.699 |
| oddPC 37:6         | 93795.6   | 115641    | 150000    | 147019.2    | 168225.8    | 123671.9    | 0.2719778  | 1.62  |
| oddPC 39:5         | 47591.2   | 30769.2   | 0         | 26442.3     | 49677.4     | 30546.9     | 0.5794488  | 0.363 |
| oddPC 39:6         | 148613.1  | 95726.5   | 29673.9   | 18653.8     | 16532.3     | 33437.5     | 0.1206402  | 3.867 |
| oddPC 39:7         | 796496.4  | 665213.7  | 629347.8  | 694711.5    | 531774.2    | 1041875     | 0.7285925  | 0.139 |
| oPDA 34:2-PG-/16:0 | 48613.139 | 69743.59  | 24239.13  | 21057.69231 | 131370.9677 | 119687.5    | 0.3123435  | 1.334 |
| oPDA 34:3-PC-/18:3 | 2557007.3 | 2462136.8 | 2601630.4 | 2084134.6   | 2328548.4   | 3817187.5   | 0.7275069  | 0.14  |
| PC 26:0            | 9043576.6 | 8403247.9 | 9340543.5 | 7276634.6   | 8011693.5   | 8646484.4   | 0.1202697  | 3.878 |
| PC 28:0            | 41012336  | 38012051  | 37600978  | 28992211.5  | 33738709.7  | 36033125    | 0.06335058 | 6.499 |
| PC 30:0            | 49890511  | 48509658  | 48320435  | 40638557.7  | 47943548.4  | 53560390.6  | 0.7065953  | 0.164 |
| PC 32:0            | 64124964  | 47951880  | 51744348  | 47173076.9  | 54628951.6  | 55100468.8  | 0.6974004  | 0.175 |
| PC 32:1            | 1.096E+09 | 949320598 | 894489891 | 819761826.9 | 927632258.1 | 968639843.8 | 0.3747053  | 0.996 |
| PC 32:2            | 714605766 | 759194103 | 686336957 | 629249230.8 | 738787338.7 | 630831875   | 0.2697605  | 1.638 |
| PC 32:3            | 7523941.6 | 6919572.6 | 6176195.7 | 4207596.2   | 6124596.8   | 8223281.3   | 0.6038387  | 0.316 |
| PC 34:0            | 39407080  | 29774872  | 29731848  | 26825192.3  | 30185887.1  | 29894609.4  | 0.3034586  | 1.392 |
| PC 34:1            | 526784234 | 455642650 | 418366196 | 385011153.8 | 405425000   | 452535625   | 0.2339858  | 1.961 |
| PC 34:2            | 722742263 | 662743419 | 590456739 | 549145961.5 | 573667822.6 | 629394531.3 | 0.1728997  | 2.745 |
| PC 34:3            | 111489927 | 97736410  | 81599783  | 72965192.3  | 72353548.4  | 113077578.1 | 0.5364438  | 0.456 |
| PC 34:4            | 16517445  | 12425128  | 12039022  | 10403269.2  | 12059677.4  | 15622890.6  | 0.6701336  | 0.211 |
| PC 34:5            | 22481.8   | 79572.6   | 27500     | 30000       | 25887.1     | 48125       | 0.6847411  | 0.191 |
| PC 36:0            | 4284744.5 | 3784273.5 | 3380760.9 | 2626826.9   | 3460322.6   | 2722968.8   | 0.07670556 | 5.623 |

|                 |           |           |           |             |             |             |             |       |
|-----------------|-----------|-----------|-----------|-------------|-------------|-------------|-------------|-------|
| PC 36:1         | 39466496  | 36233504  | 31654891  | 29765865.4  | 30244193.5  | 34262812.5  | 0.1787157   | 2.653 |
| PC 36:2         | 208114891 | 182903077 | 166959674 | 161271538.5 | 160861048.4 | 160381484.4 | 0.103754    | 4.406 |
| PC 36:3         | 60267372  | 49016838  | 44360544  | 39237500    | 44748467.7  | 50383984.4  | 0.3237315   | 1.264 |
| PC 36:4         | 111821752 | 81995385  | 71465109  | 59663942.3  | 76267580.6  | 107281640.6 | 0.7106216   | 0.159 |
| PC 36:5         | 109263723 | 87146325  | 78250870  | 63162403.8  | 74520080.6  | 112915312.5 | 0.6731074   | 0.206 |
| PC 36:6         | 168394.2  | 262393.2  | 85652.2   | 102692.3    | 0           | 126328.1    | 0.2093816   | 2.233 |
| PC 38:2         | 1659708   | 1375641   | 980543.5  | 966153.8    | 936209.7    | 1217500     | 0.2392567   | 1.909 |
| PC 38:3         | 193868.6  | 91025.6   | 146087    | 69134.6     | 127096.8    | 88046.9     | 0.2267088   | 2.037 |
| PC 38:4         | 18686.1   | 22478.6   | 45760.9   | 39903.8     | 10887.1     | 73203.1     | 0.5681697   | 0.386 |
| PC 38:5         | 48175.2   | 31709.4   | 0         | 21250       | 16209.7     | 4062.5      | 0.4427953   | 0.724 |
| PC 38:6         | 160948.9  | 104615.4  | 73913     | 300288.5    | 187741.9    | 94218.8     | 0.2797895   | 1.56  |
| PC 38:7         | 287810.2  | 223418.8  | 296739.1  | 105673.1    | 167500      | 179062.5    | 0.02167337  | 13.36 |
| PC 40:5         | 40583.9   | 20341.9   | 12500     | 55288.5     | 12096.8     | 18437.5     | 0.8072185   | 0.068 |
| PC 40:6         | 45401.5   | 35299.1   | 30543.5   | 87115.4     | 94032.3     | 26640.6     | 0.2147541   | 2.17  |
| PC 40:7         | 98467.2   | 96068.4   | 136739.1  | 44711.5     | 142822.6    | 97187.5     | 0.6456232   | 0.246 |
| PC(O-32:2)      | 7722043.8 | 8168803.4 | 6812500   | 5444615.4   | 6158145.2   | 8610312.5   | 0.4688551   | 0.639 |
| PC(O-34:4)      | 485839.4  | 265384.6  | 352065.2  | 219423.1    | 234758.1    | 384218.8    | 0.3469196   | 1.134 |
| PC(O-36:0)      | 3907080.3 | 2801880.3 | 2993478.3 | 2430000     | 2031693.5   | 2240078.1   | 0.04984525  | 7.725 |
| PC(O-36:2)      | 18313796  | 17914872  | 14745870  | 14877788.5  | 14659919.4  | 17010156.3  | 0.3373895   | 1.186 |
| PC(P-30:0)      | 4440365   | 4291880.3 | 4975543.5 | 3158557.7   | 4311129     | 4763203.1   | 0.3986822   | 0.891 |
| PC(P-36:5)      | 735109.5  | 575128.2  | 514782.6  | 578653.8    | 753871      | 802343.8    | 0.3359919   | 1.194 |
| PE 32:0         | 17247956  | 17929487  | 16842717  | 15858942.3  | 15376371    | 15761875    | 0.008721286 | 22.93 |
| PE 32:1         | 237484818 | 243279658 | 244171196 | 231442403.8 | 214786209.7 | 213220625   | 0.0243811   | 12.41 |
| PE 34:0         | 43958759  | 41572137  | 46956413  | 37729903.8  | 36855403.2  | 37856328.1  | 0.01364306  | 17.68 |
| PE 34:1         | 401046861 | 389968291 | 434603696 | 361227307.7 | 343832822.6 | 358428671.9 | 0.02017383  | 13.96 |
| PE 34:2         | 346979051 | 334245214 | 380795217 | 320874807.7 | 302802338.7 | 305419687.5 | 0.04173252  | 8.736 |
| PE 34:3         | 76113577  | 64712650  | 72089130  | 54544038.5  | 61941129    | 67815546.9  | 0.1340985   | 3.515 |
| PE 35:1         | 12525256  | 12132992  | 15209565  | 15624423.1  | 10242741.9  | 9846406.3   | 0.5455462   | 0.435 |
| PE 35:2         | 25839416  | 27483932  | 32513044  | 27298942.3  | 23905161.3  | 22257187.5  | 0.1738139   | 2.73  |
| PE 36:0         | 5636861.3 | 4813076.9 | 5885652.2 | 4701826.9   | 4596209.7   | 4878203.1   | 0.09770534  | 4.633 |
| PE 36:1         | 57491971  | 52846325  | 60681196  | 50672115.4  | 48055403.2  | 51657265.6  | 0.05222834  | 7.475 |
| PE 36:2         | 157669051 | 159036154 | 181564891 | 152664519.2 | 141082661.3 | 142857031.3 | 0.0738816   | 5.788 |
| PE 36:3         | 70605110  | 68882992  | 78503370  | 60265000    | 59292258.1  | 66234531.3  | 0.04310714  | 8.545 |
| PE 36:4         | 20607299  | 18850513  | 20995326  | 15521634.6  | 15551774.2  | 20285546.9  | 0.1518665   | 3.124 |
| PE 36:5         | 2020438   | 1528205.1 | 1512608.7 | 1171923.1   | 1306209.7   | 1505468.8   | 0.1359737   | 3.47  |
| PE 38:3         | 563649.6  | 759829.1  | 684347.8  | 557500      | 340806.5    | 515859.4    | 0.08674489  | 5.105 |
| PE 38:4         | 24598.5   | 13846.2   | 23587     | 13846.2     | 3467.7      | 15312.5     | 0.1250373   | 3.746 |
| PE 40:7         | 37153.3   | 43846.2   | 14130.4   | 44807.7     | 19032.3     | 19453.1     | 0.7661612   | 0.101 |
| PE(O-18:1 18:2) | 9493868.6 | 7559401.7 | 11073152  | 9691826.9   | 7764354.8   | 8626406.3   | 0.5882176   | 0.346 |
| PE(O-18:2 18:2) | 41897.8   | 153418.8  | 193369.6  | 32019.2     | 93548.4     | 100000      | 0.3399839   | 1.171 |
| PE(O-34:1)      | 8661386.9 | 8199914.5 | 10076630  | 10124038.5  | 7471209.7   | 6830234.4   | 0.5087314   | 0.525 |

|                   |           |           |           |             |             |             |             |       |
|-------------------|-----------|-----------|-----------|-------------|-------------|-------------|-------------|-------|
| PE(O-34:2)        | 6361678.8 | 5982649.6 | 7311739.1 | 6932403.8   | 6027500     | 6576171.9   | 0.9369264   | 0.007 |
| PE(O-36:2)        | 27859562  | 29841624  | 34486087  | 28140673.1  | 24538709.7  | 24543046.9  | 0.09606844  | 4.698 |
| PE(O-36:5)        | 19854     | 19914.5   | 41304.3   | 132980.8    | 0           | 86953.1     | 0.307767    | 1.364 |
| PE(O-36:6)        | 832919.7  | 690427.4  | 813587    | 843076.9    | 572177.4    | 486640.6    | 0.2805778   | 1.554 |
| PE(P-34:1)        | 6361678.8 | 5982649.6 | 7311739.1 | 6932403.8   | 6027500     | 6576171.9   | 0.9369264   | 0.007 |
| PE(P-34:2)        | 76569.3   | 58717.9   | 24782.6   | 80192.3     | 18790.3     | 53515.6     | 0.919236    | 0.012 |
| PE(P-36:1)        | 25839416  | 27483932  | 32513044  | 27298942.3  | 23753225.8  | 22257187.5  | 0.1705771   | 2.783 |
| PE(P-36:2)        | 9493868.6 | 7559401.7 | 11271957  | 9691826.9   | 7764354.8   | 8626406.3   | 0.5696248   | 0.383 |
| PE(P-38:5)        | 140219    | 142820.5  | 68804.3   | 105000      | 48064.5     | 61015.6     | 0.1975465   | 2.383 |
| PE(P-38:6)        | 4187372.3 | 3996495.7 | 4022608.7 | 3060769.2   | 3351290.3   | 2979609.4   | 0.001825665 | 54.01 |
| PE(P-40:6)        | 2060802.9 | 2177777.8 | 1853587   | 1723846.2   | 1638225.8   | 1584687.5   | 0.02076799  | 13.72 |
| PG 34:0           | 1762481.8 | 1901623.9 | 1815217.4 | 1730480.8   | 1372903.2   | 1703906.3   | 0.1401258   | 3.374 |
| PG 34:1           | 12057226  | 10262821  | 9922717.4 | 8525192.3   | 8958467.7   | 9219296.9   | 0.05598035  | 7.113 |
| PG 36:1           | 1354744.5 | 1532307.7 | 1240108.7 | 1201730.8   | 1186209.7   | 1193984.4   | 0.09962221  | 4.559 |
| PG 36:2           | 7116569.3 | 6103418.8 | 5485652.2 | 5510576.9   | 5698790.3   | 5294921.9   | 0.2082367   | 2.247 |
| PI 32:0           | 3993284.7 | 2875555.6 | 2184021.7 | 2149230.8   | 2722903.2   | 3142890.6   | 0.5954946   | 0.332 |
| PI 32:1           | 40995183  | 36499573  | 28978370  | 25323461.5  | 32839838.7  | 33194453.1  | 0.3106745   | 1.345 |
| PI 34:1           | 36341168  | 31234615  | 26673152  | 23167307.7  | 27012016.1  | 29848750    | 0.2354724   | 1.946 |
| PI 36:2           | 33692117  | 27380427  | 23406087  | 22153846.2  | 24469032.3  | 24762500    | 0.2327181   | 1.974 |
| PI 36:3           | 56620584  | 44548974  | 35233044  | 34578365.4  | 37504435.5  | 47469062.5  | 0.4855577   | 0.589 |
| PI 36:4           | 9890365   | 8441709.4 | 6787282.6 | 6286730.8   | 7046209.7   | 9191718.8   | 0.5267677   | 0.479 |
| PI 38:2           | 784890.5  | 634017.1  | 568152.2  | 472211.5    | 715161.3    | 922265.6    | 0.7921069   | 0.079 |
| PI 38:3           | 363065.7  | 291111.1  | 267065.2  | 214038.5    | 277983.9    | 105390.6    | 0.1364752   | 3.458 |
| PI 38:4           | 20656.9   | 23931.6   | 3260.9    | 30769.2     | 29354.8     | 37109.4     | 0.07391704  | 5.786 |
| PI 38:5           | 13868.6   | 6923.1    | 1087      | 49807.7     | 17419.4     | 4843.8      | 0.2948924   | 1.45  |
| PS 34:0           | 1448175.2 | 1458034.2 | 536413    | 696250      | 1467983.9   | 1201250     | 0.9493318   | 0.005 |
| PS 36:1           | 19808832  | 15226667  | 4062282.6 | 5065961.5   | 15080322.6  | 14747031.3  | 0.8183179   | 0.06  |
| PS 36:2           | 47652920  | 38141197  | 11469783  | 15043365.4  | 37326935.5  | 40218437.5  | 0.9132573   | 0.013 |
| PS 38:3           | 353211.7  | 206581.2  | 0         | 107596.2    | 152016.1    | 380390.6    | 0.8502719   | 0.041 |
| PS 38:4           | 33138.7   | 51111.1   | 26195.7   | 0           | 18467.7     | 703.1       | 0.03357938  | 10.1  |
| TG 14:0 16:0 18:2 | 630494526 | 669751966 | 759477391 | 637754903.8 | 588883225.8 | 562839140.6 | 0.1102426   | 4.184 |
| TG 14:0 16:1 18:1 | 535521898 | 549114444 | 615328696 | 531858846.2 | 448805725.8 | 427522734.4 | 0.07309414  | 5.836 |
| TG 14:0 16:1 18:2 | 74904015  | 76900940  | 93190109  | 62291730.8  | 62376854.8  | 28402968.8  | 0.07344528  | 5.815 |
| TG 14:0 18:0 18:1 | 59737883  | 66918974  | 35529348  | 69723846.2  | 55801371    | 52741250    | 0.6468555   | 0.245 |
| TG 14:0 18:2 18:2 | 230948.9  | 152906    | 236087    | 59519.2     | 146854.8    | 43828.1     | 0.04217791  | 8.673 |
| TG 14:1 16:0 18:1 | 40544380  | 46924957  | 133421848 | 100754807.7 | 40597500    | 34360468.8  | 0.7024161   | 0.169 |
| TG 14:1 16:1 18:0 | 1.567E+09 | 1.696E+09 | 1.83E+09  | 1588410865  | 1369096452  | 1273010078  | 0.07523534  | 5.708 |
| TG 14:1 18:0 18:2 | 2523065.7 | 2262991.5 | 3556521.7 | 2199423.1   | 1661612.9   | 1753750     | 0.1011256   | 4.502 |
| TG 14:1 18:1 18:1 | 32043.8   | 427350.4  | 108804.3  | 108173.1    | 280161.3    | 273828.1    | 0.825998    | 0.055 |
| TG 15:0 18:1 16:0 | 108613.1  | 0         | 8587      | 14134.6     | 27500       | 38750       | 0.747536    | 0.119 |
| TG 15:0 18:1 18:1 | 675401.5  | 627777.8  | 616087    | 332788.5    | 411612.9    | 335546.9    | 0.000894462 | 78.58 |

|                   |           |           |           |             |             |             |             |       |
|-------------------|-----------|-----------|-----------|-------------|-------------|-------------|-------------|-------|
| TG 16:0 16:0 16:0 | 97078540  | 109914957 | 114342283 | 129398269.2 | 105531532.3 | 101833125   | 0.636502    | 0.261 |
| TG 16:0 16:0 18:0 | 21970365  | 27405043  | 26078370  | 28999134.6  | 24242177.4  | 23734453.1  | 0.8391386   | 0.047 |
| TG 16:0 16:0 18:1 | 3375036.5 | 4664957.3 | 4567282.6 | 3939134.6   | 3148145.2   | 3569531.3   | 0.2416241   | 1.886 |
| TG 16:0 16:0 18:2 | 6980365   | 6661111.1 | 20597391  | 7918557.7   | 6402419.4   | 6813125     | 0.3975101   | 0.896 |
| TG 16:0 16:1 18:1 | 5438394.2 | 6583418.8 | 6842608.7 | 5585096.2   | 5092500     | 5335781.3   | 0.1045758   | 4.377 |
| TG 16:0 18:0 18:1 | 59024380  | 108557094 | 58420544  | 89813750    | 76205564.5  | 67903906.3  | 0.8892403   | 0.022 |
| TG 16:0 18:1 18:1 | 4514671.5 | 5233162.4 | 5572173.9 | 4865096.2   | 4420161.3   | 4185781.3   | 0.1710707   | 2.775 |
| TG 16:0 18:1 18:2 | 327445.3  | 400085.5  | 417717.4  | 346346.2    | 355483.9    | 276093.8    | 0.2092685   | 2.235 |
| TG 16:0 18:2 18:2 | 164160.6  | 251623.9  | 122717.4  | 41250       | 100161.3    | 264296.9    | 0.5952109   | 0.332 |
| TG 16:1 16:1 16:1 | 544308905 | 561594786 | 630601957 | 544777980.8 | 444975887.1 | 438364921.9 | 0.07673957  | 5.622 |
| TG 16:1 16:1 18:0 | 28997226  | 31229145  | 42371739  | 30797500    | 23697258.1  | 21328203.1  | 0.1500866   | 3.16  |
| TG 16:1 16:1 18:1 | 32561314  | 36603248  | 43274783  | 36356057.7  | 31775967.7  | 29376015.6  | 0.2535037   | 1.776 |
| TG 16:1 18:1 18:1 | 35266423  | 35700855  | 49396413  | 37136250    | 29368548.4  | 26151875    | 0.178695    | 2.653 |
| TG 16:1 18:1 18:2 | 2711824.8 | 2434444.4 | 5661195.7 | 2449423.1   | 2541935.5   | 2158515.6   | 0.305687    | 1.377 |
| TG 17:0 16:0 16:1 | 76938029  | 98935385  | 84180326  | 81295000    | 84004032.3  | 65547890.6  | 0.3238374   | 1.264 |
| TG 17:0 16:0 18:0 | 3445620.4 | 6447008.5 | 3920000   | 2587692.3   | 1986129     | 4685546.9   | 0.2880586   | 1.499 |
| TG 17:0 17:0 17:0 | 3174671.5 | 4165470.1 | 2765326.1 | 4411250     | 3235483.9   | 2390781.3   | 0.9763553   | 0.001 |
| TG 17:0 18:1 14:0 | 19571971  | 24934188  | 21418044  | 27808750    | 21370161.3  | 14805703.1  | 0.8814796   | 0.025 |
| TG 17:0 18:1 16:0 | 12858248  | 18501709  | 15449239  | 13684519.2  | 11267822.6  | 9921406.3   | 0.113254    | 4.088 |
| TG 17:0 18:1 16:1 | 15497153  | 16956496  | 17988478  | 20767980.8  | 16458225.8  | 13196796.9  | 0.9979291   | 0     |
| TG 17:0 18:1 18:1 | 855182.5  | 997435.9  | 820760.9  | 1041538.5   | 952096.8    | 524140.6    | 0.7736709   | 0.095 |
| TG 17:0 18:2 16:0 | 27540073  | 32246325  | 28521630  | 22278557.7  | 19300645.2  | 14462031.3  | 0.01617559  | 15.97 |
| TG 18:0 18:0 18:0 | 304525.5  | 271196.6  | 322173.9  | 502403.8    | 263790.3    | 398984.4    | 0.2760167   | 1.589 |
| TG 18:0 18:0 18:1 | 1717080.3 | 3172222.2 | 1811195.7 | 3810865.4   | 2628548.4   | 3176875     | 0.1697553   | 2.797 |
| TG 18:0 18:1 18:1 | 3664671.5 | 11226239  | 3179130.4 | 2717403.8   | 2973225.8   | 3271015.6   | 0.3094043   | 1.353 |
| TG 18:0 18:2 18:2 | 40219     | 11282.1   | 34565.2   | 0           | 17096.8     | 178906.3    | 0.5597678   | 0.404 |
| TG 18:1 14:0 16:0 | 485358029 | 561037949 | 554505326 | 545518653.8 | 516687983.9 | 504617890.6 | 0.6964439   | 0.176 |
| TG 18:1 18:1 18:1 | 250656.9  | 229658.1  | 290760.9  | 332596.2    | 149596.8    | 179375      | 0.5724648   | 0.377 |
| TG 18:1 18:1 18:2 | 207518.2  | 96666.7   | 62500     | 32115.4     | 87258.1     | 90390.6     | 0.3342906   | 1.203 |
| TG 18:1 18:2 18:2 | 2992.7    | 37179.5   | 10000     | 45865.4     | 56693.5     | 38671.9     | 0.05995372  | 6.768 |
| TG 48:0           | 46913942  | 52399915  | 47269674  | 48338365.4  | 42165806.5  | 40000000    | 0.1550304   | 3.062 |
| TG 48:1           | 164514015 | 177732821 | 186932174 | 170433461.5 | 145803629   | 149075625   | 0.1026954   | 4.445 |
| TG 48:2           | 80404599  | 76567350  | 85193261  | 73587307.7  | 62969838.7  | 57940781.3  | 0.03877128  | 9.182 |
| TG 48:3           | 36990073  | 40431966  | 41958370  | 30483750    | 28832822.6  | 27722890.6  | 0.002991302 | 41.47 |
| TG 49:1           | 6306934.3 | 5606068.4 | 6853804.3 | 7800576.9   | 5695564.5   | 5009687.5   | 0.9287522   | 0.009 |
| TG 50:0           | 27762847  | 33635983  | 29193478  | 30010000    | 24315967.7  | 25390156.3  | 0.2184199   | 2.128 |
| TG 50:1           | 106276204 | 115199915 | 61127609  | 112902115.4 | 95029193.5  | 93601015.6  | 0.7415893   | 0.125 |
| TG 50:2           | 64464380  | 68555470  | 72122500  | 62700384.6  | 51560241.9  | 48716250    | 0.0430641   | 8.551 |
| TG 50:3           | 20103723  | 20226239  | 23291739  | 17914134.6  | 16890887.1  | 14818359.4  | 0.02803587  | 11.36 |
| TG 50:4           | 556934.3  | 1131880.3 | 1488804.3 | 1084423.1   | 804596.8    | 753281.3    | 0.5720145   | 0.378 |
| TG 51:0           | 952116.8  | 1751709.4 | 1355434.8 | 1817211.5   | 1514354.8   | 810781.3    | 0.9449686   | 0.005 |

|         |           |           |           |            |            |            |           |       |
|---------|-----------|-----------|-----------|------------|------------|------------|-----------|-------|
| TG 51:2 | 4082408.8 | 3913247.9 | 4600434.8 | 4359230.8  | 3358548.4  | 2727187.5  | 0.2386174 | 1.915 |
| TG 52:1 | 17029562  | 27634274  | 16381630  | 20941634.6 | 18247177.4 | 16332968.8 | 0.6602515 | 0.225 |
| TG 52:2 | 18027226  | 19326068  | 22579565  | 18770192.3 | 15481854.8 | 16533828.1 | 0.1410778 | 3.352 |
| TG 52:4 | 233941.6  | 283418.8  | 284565.2  | 371057.7   | 313629     | 177187.5   | 0.7553032 | 0.111 |
| TG 53:2 | 16276350  | 28321111  | 18355544  | 20452692.3 | 13176451.6 | 12470546.9 | 0.2807394 | 1.553 |
| TG 54:1 | 594087.6  | 828974.4  | 395652.2  | 571346.2   | 587661.3   | 662890.6   | 0.9937995 | 0     |
| TG 54:2 | 9854      | 35299.1   | 7500      | 44807.7    | 65564.5    | 12187.5    | 0.2629782 | 1.694 |
| TG 54:3 | 1263211.7 | 1341025.6 | 1254456.5 | 1181730.8  | 1023629    | 1365859.4  | 0.4033815 | 0.872 |
| TG 54:4 | 276204.4  | 135213.7  | 39565.2   | 28365.4    | 135725.8   | 70859.4    | 0.3941196 | 0.91  |
| TG 54:5 | 172627.7  | 133589.7  | 86630.4   | 136346.2   | 32016.1    | 109765.6   | 0.3929188 | 0.915 |
| TG 54:6 | 199124.1  | 232051.3  | 338587    | 499038.5   | 218467.7   | 266953.1   | 0.498535  | 0.553 |
| TG 56:6 | 76715.3   | 142649.6  | 244347.8  | 120192.3   | 21612.9    | 18828.1    | 0.1623456 | 2.926 |
| TG 56:8 | 518978.1  | 423589.7  | 645108.7  | 747596.2   | 219354.8   | 414765.6   | 0.702093  | 0.169 |

**Table S2. Imidacloprid perturbs the expression of genes involved in xenobiotic metabolism, lipid metabolism, neurodegeneration, oxidative stress, and immune response.** List of genes of interest affected by 2.5 ppm imidacloprid exposure for 2 hr. Brain and fat body transcriptomic analysis (↓ gene downregulated; ↑ gene upregulated).

| Flybase ID                           | Gene             | Brain - Imidacloprid |             |             | Fat body - Imidacloprid |             |             |
|--------------------------------------|------------------|----------------------|-------------|-------------|-------------------------|-------------|-------------|
|                                      |                  | Response             | Fold change | adj p-value | Response                | Fold change | adj p-value |
| <b>ROS generation</b>                |                  |                      |             |             |                         |             |             |
| FBgn0283531                          | <i>Duox</i>      | -                    | -           | -           | -                       | -           | -           |
| FBgn0085428                          | <i>Nox</i>       | ↓                    | - 2.80      | 0.000243    | -                       | -           | -           |
| FBgn0011676                          | <i>Nos</i>       | ↑                    | 1.70        | 0.000000    | -                       | -           | -           |
| <b>Mitochondrial function</b>        |                  |                      |             |             |                         |             |             |
| FBgn0029870                          | <i>Marf</i>      | ↑                    | 1.20        | 0.000000    | -                       | -           | -           |
| FBgn0013679                          | <i>mt:ND1</i>    | ↑                    | 1.20        | 0.005944    | -                       | -           | -           |
| FBgn0013680                          | <i>mt:ND2</i>    | -                    | -           | -           | -                       | -           | -           |
| FBgn0013681                          | <i>mt:ND3</i>    | -                    | -           | -           | -                       | -           | -           |
| FBgn0262952                          | <i>mt:ND4</i>    | ↑                    | 1.20        | 0.000457    | -                       | -           | -           |
| FBgn0013684                          | <i>mt:ND5</i>    | -                    | -           | -           | -                       | -           | -           |
| FBgn0013685                          | <i>mt:ND6</i>    | -                    | -           | -           | -                       | -           | -           |
| FBgn0030718                          | <i>ND-20</i>     | ↑                    | 1.10        | 0.006502    | -                       | -           | -           |
| FBgn0017567                          | <i>ND-23</i>     | ↑                    | 1.20        | 0.000000    | -                       | -           | -           |
| FBgn0047038                          | <i>ND-13B</i>    | -                    | -           | -           | -                       | -           | -           |
| FBgn0031771                          | <i>ND-51</i>     | ↑                    | 1.20        | 0.000000    | -                       | -           | -           |
| FBgn0031228                          | <i>ND-15</i>     | -                    | -           | -           | -                       | -           | -           |
| FBgn0266582                          | <i>ND-30</i>     | ↑                    | 1.10        | 0.003752    | -                       | -           | -           |
| FBgn0035046                          | <i>ND-19</i>     | ↑                    | 1.10        | 0.001247    | -                       | -           | -           |
| FBgn0019957                          | <i>ND42</i>      | ↑                    | 1.10        | 0.000006    | -                       | -           | -           |
| FBgn0013678                          | <i>mt:Cyt-b</i>  | ↑                    | 1.10        | 0.001835    | -                       | -           | -           |
| FBgn0035600                          | <i>Cyt-c1</i>    | ↑                    | 1.30        | 0.000000    | -                       | -           | -           |
| FBgn0021906                          | <i>RFeSP</i>     | ↑                    | 1.20        | 0.000000    | -                       | -           | -           |
| FBgn0013674                          | <i>mt:Col</i>    | ↑                    | 1.20        | 0.000000    | -                       | -           | -           |
| FBgn0013675                          | <i>mt:Coll</i>   | -                    | -           | -           | -                       | -           | -           |
| FBgn0013676                          | <i>mt:CollI</i>  | ↑                    | 1.10        | 0.000138    | -                       | -           | -           |
| FBgn0010100                          | <i>mAcon1</i>    | ↑                    | 1.20        | 0.000000    | -                       | -           | -           |
| <b>Oxidative Stress Response</b>     |                  |                      |             |             |                         |             |             |
| FBgn0000229                          | <i>bsk (JNK)</i> | ↑                    | 1.10        | 0.000255    | --                      | --          | --          |
| FBgn0010303                          | <i>Hep</i>       | ↑                    | 1.10        | 0.003549    | --                      | --          | --          |
| FBgn0001297                          | <i>kay (Fos)</i> | ↑                    | 1.17        | 0.000000    | --                      | --          | --          |
| FBgn0038475                          | <i>Keap1</i>     | ↑                    | 1.21        | 0.023706    | ↑                       | 2.20        | 0.000210    |
| FBgn0034534                          | <i>maf-S</i>     | ↑                    | 1.10        | 0.030073    | --                      | --          | --          |
| FBgn0010213                          | <i>Sod2</i>      | ↑                    | 1.11        | 0.000120    | --                      | --          | --          |
| FBgn0000261                          | <i>Cat</i>       | ↓                    | -1.08       | 0.002721    | --                      | --          | --          |
| <b>Xenobiotic metabolism (P450s)</b> |                  |                      |             |             |                         |             |             |
| FBgn0035154                          | <i>Cyp9b2</i>    | ↓                    | -0.64       | 0.018314    | --                      | --          | --          |
| FBgn0005655                          | <i>Cyp6v1</i>    | ↓                    | -0.76       | 0.000000    | --                      | --          | --          |
| FBgn0038006                          | <i>Cyp313a2</i>  | ↑                    | 6.67        | 0.001044    | --                      | --          | --          |
| FBgn0039519                          | <i>Cyp6a18</i>   | ↑                    | 6.40        | 0.000000    | ↑                       | 2.39        | 0.000024    |
| FBgn0033065                          | <i>Cyp6w1</i>    | ↑                    | 3.17        | 0.000000    | --                      | --          | --          |
| FBgn0000473                          | <i>Cyp6a2</i>    | ↑                    | 2.62        | 0.000000    | --                      | --          | --          |
| FBgn0013771                          | <i>Cyp6a9</i>    | ↑                    | 2.07        | 0.000000    | --                      | --          | --          |
| FBgn0013772                          | <i>Cyp6a8</i>    | ↑                    | 1.96        | 0.006559    | ↑                       | 2.25        | 0.005318    |
| FBgn0000473                          | <i>Cyp6g2</i>    | ↑                    | 1.91        | 0.000000    | --                      | --          | --          |

|                                               |                 |    |       |          |    |       |          |
|-----------------------------------------------|-----------------|----|-------|----------|----|-------|----------|
| FBgn0013773                                   | Cyp6a22         | ↑  | 1.80  | 0.011175 | -- | --    | --       |
| FBgn0038037                                   | Cyp9f2          | ↑  | 1.47  | 0.000000 | -- | --    | --       |
| FBgn0033775                                   | Cyp9h1          | ↑  | 1.46  | 0.000000 | -- | --    | --       |
| FBgn0033302                                   | Cyp6a14         | ↑  | 1.41  | 0.028973 | -- | --    | --       |
| FBgn0015038                                   | Cyp9b1          | -- | --    | --       | ↓  | -0.56 | 0.008736 |
| FBgn0034053                                   | Cyp4aa1         | -- | --    | --       | ↑  | 4.92  | 0.035861 |
| <b>Glutathione-s-transferases (GSTs)</b>      |                 |    |       |          |    |       |          |
| FBgn0001149                                   | GstD1           | ↓  | -1.20 | 0.000000 | ↓  | -1.95 | 0.002778 |
| FBgn0010039                                   | GstD3           | -- | --    | --       | ↓  | -3.71 | 0.000762 |
| FBgn0010040                                   | GstD4           | -- | --    | --       | ↓  | -3.80 | 0.000000 |
| FBgn0010041                                   | GstD5           | -- | --    | --       | ↓  | -2.42 | 0.000006 |
| FBgn0010043                                   | GstD7           | ↑  | 4.38  | 0.000000 | -- | --    | --       |
| FBgn0038020                                   | GstD9           | -- | --    | --       | ↓  | -2.75 | 0.002660 |
| FBgn0063498                                   | GstE2           | ↑  | 1.19  | 0.019430 | -- | --    | --       |
| FBgn0063497                                   | GstE3           | ↑  | 1.43  | 0.003285 | -- | --    | --       |
| FBgn0063496                                   | GstE4           | ↑  | 2.80  | 0.005891 | -- | --    | --       |
| FBgn0063494                                   | GstE6           | -- | --    | --       | ↓  | -3.06 | 0.000000 |
| FBgn0063493                                   | GstE7           | -- | --    | --       | ↓  | -3.63 | 0.012443 |
| FBgn0063491                                   | GstE9           | ↑  | 2.58  | 0.000000 | -- | --    | --       |
| FBgn0034354                                   | GstE11          | ↓  | -1.65 | 0.000000 | ↓  | -1.80 | 0.013776 |
| FBgn0033381                                   | GstE13          | ↓  | -1.17 | 0.004813 | -- | --    | --       |
| FBgn0035904                                   | GstO3           | ↓  | -1.41 | 0.000000 | -- | --    | --       |
| FBgn0010226                                   | GstS1           | ↓  | -1.71 | 0.000478 | -- | --    | --       |
| FBgn0050000                                   | GstT1           | -- | --    | --       | ↓  | -1.60 | 0.049502 |
| FBgn0050005                                   | GstT2           | -- | --    | --       | ↑  | 1.70  | 0.041407 |
| FBgn0031117                                   | GstT3           | ↑  | 1.22  | 0.018348 | -- | --    | --       |
| FBgn0030484                                   | GstT4           | -- | --    | --       | ↑  | 2.10  | 0.000056 |
| <b>Lipid metabolism and neurodegeneration</b> |                 |    |       |          |    |       |          |
| FBgn0261283                                   | SREBP           | ↑  | 1.10  | 0.000354 | -- | --    | --       |
| FBgn0011656                                   | Mef2            | ↑  | 1.48  | 0.000000 | -- | --    | --       |
| FBgn0033799                                   | Glial Iazarillo | ↑  | 1.56  | 0.000000 | -- | --    | --       |
| FBgn0028325                                   | Pdha            | ↑  | 1.36  | 0.000000 | -- | --    | --       |
| FBgn0039635                                   | Pdhb            | ↑  | 1.20  | 0.000000 | -- | --    | --       |
| FBgn0001258                                   | Ldh             | ↑  | 1.41  | 0.000000 | -- | --    | --       |
| FBgn0261955                                   | kdn             | ↑  | 1.44  | 0.000000 | -- | --    | --       |
| FBgn0033657                                   | Silnoon         | ↑  | 1.45  | 0.000000 | -- | --    | --       |
| FBgn0261822                                   | Basigin         | ↑  | 1.21  | 0.000000 | -- | --    | --       |
| FBgn0085387                                   | Shaking B       | ↑  | 1.73  | 0.000000 | -- | --    | --       |
| FBgn0053087                                   | LRP1            | -- | --    | --       | ↑  | 1.58  | 0.048743 |
| FBgn0087002                                   | apolpp          | ↑  | 1.81  | 0.000000 | -- | --    | --       |
| FBgn0032136                                   | Apoltp          | ↑  | 2.90  | 0.000000 | -- | --    | --       |
| FBgn0029994                                   | Ldsdh1          | ↑  | 1.69  | 0.000000 | -- | --    | --       |
| FBgn0051092                                   | LpR2            | ↑  | 1.26  | 0.000000 | -- | --    | --       |
| FBgn0066101                                   | LpR1            | ↑  | 1.41  | 0.000000 | -- | --    | --       |
| FBgn0026718                                   | Agpat2          | ↑  | 1.21  | 0.003232 | -- | --    | --       |
| FBgn0039114                                   | Lsd-1           | ↑  | 1.64  | 0.000000 | -- | --    | --       |
| FBgn0030608                                   | Lsd-2           | ↑  | 1.05  | 0.036574 | -- | --    | --       |
| FBgn0037913                                   | fabp            | ↓  | -1.59 | 0.000000 | -- | --    | --       |
| FBgn0040212                                   | Dhap-at         | ↑  | 1.16  | 0.013088 | -- | --    | --       |
| FBgn0263593                                   | Lipin           | ↑  | 1.12  | 0.000041 | -- | --    | --       |
| FBgn0039471                                   | CG6295          | ↓  | -2.91 | 0.000000 | -- | --    | --       |
| FBgn0036996                                   | mag             | ↑  | 2.75  | 0.000000 | -- | --    | --       |
| FBgn0036449                                   | bmm             | ↑  | 1.65  | 0.000000 | -- | --    | --       |
| FBgn0000568                                   | Eip75B          | ↑  | 1.16  | 0.000000 | -- | --    | --       |
| FBgn0265187                                   | fatp2           | ↓  | -1.65 | 0.019004 | -- | --    | --       |
| <b>Neuronal receptors</b>                     |                 |    |       |          |    |       |          |

|                        |                   |    |         |          |    |         |          |
|------------------------|-------------------|----|---------|----------|----|---------|----------|
| FBgn0004168            | 5-HT1A            | ↑  | 1.65    | 0.000000 | -- | --      | --       |
| FBgn0263116            | 5-HT1B            | ↑  | 1.38    | 0.000000 | -- | --      | --       |
| FBgn0087012            | 5-HT2A            | ↑  | 1.87    | 0.000000 | -- | --      | --       |
| FBgn0261929            | 5-HT2B            | ↑  | 1.71    | 0.000000 | -- | --      | --       |
| FBgn0004573            | 5-HT7             | ↑  | 1.70    | 0.000000 | -- | --      | --       |
| FBgn0039927            | CG11155           | ↑  | 1.47    | 0.000000 | -- | --      | --       |
| FBgn0033558            | CG12344           | ↑  | 1.56    | 0.000980 | -- | --      | --       |
| FBgn0038653            | CG18208           | ↑  | 1.38    | 0.000000 | -- | --      | --       |
| FBgn0038837            | CG3822            | ↑  | 1.43    | 0.000000 | -- | --      | --       |
| FBgn0011582            | Dop1R1            | ↑  | 1.64    | 0.000000 | -- | --      | --       |
| FBgn0266137            | Dop1R2            | ↑  | 1.57    | 0.000000 | -- | --      | --       |
| FBgn0053517            | Dop2R             | ↑  | 1.68    | 0.000000 | -- | --      | --       |
| FBgn0035538            | DopEcR            | ↑  | 1.67    | 0.000000 | -- | --      | --       |
| FBgn0260446            | GABA-B-R1         | ↑  | 1.63    | 0.000000 | -- | --      | --       |
| FBgn0027575            | GABA-B-R2         | ↑  | 1.46    | 0.000000 | -- | --      | --       |
| FBgn0031275            | GABA-B-R3         | ↑  | 1.67    | 0.000000 | -- | --      | --       |
| FBgn0024963            | GluClalpha        | ↑  | 1.48    | 0.000000 | -- | --      | --       |
| FBgn0004619            | GluRIA            | ↑  | 1.63    | 0.000000 | -- | --      | --       |
| FBgn0264000            | GluRIB            | ↑  | 1.68    | 0.000000 | -- | --      | --       |
| FBgn0020429            | GluRIIB           | ↑  | 2.21    | 0.001750 | -- | --      | --       |
| FBgn0046113            | GluRIIC           | ↑  | 1.67    | 0.004010 | -- | --      | --       |
| FBgn0028422            | GluRIID           | ↑  | 1.83    | 0.000020 | -- | --      | --       |
| FBgn0051201            | GluRIIE           | ↑  | 1.62    | 0.001740 | -- | --      | --       |
| FBgn0001134            | Grd               | ↑  | 1.49    | 0.046580 | -- | --      | --       |
| FBgn0010240            | Lcch3             | ↑  | 1.39    | 0.000000 | -- | --      | --       |
| FBgn0000037            | mAChR-A           | ↑  | 1.47    | 0.000000 | -- | --      | --       |
| FBgn0037546            | mAChR-B           | ↑  | 1.78    | 0.000000 | -- | --      | --       |
| FBgn0000036            | nAChRalpha1       | ↑  | 1.46    | 0.000000 | -- | --      | --       |
| FBgn0000039            | nAChRalpha2       | ↑  | 1.40    | 0.000000 | -- | --      | --       |
| FBgn0015519            | nAChRalpha3       | ↑  | 1.53    | 0.000000 | -- | --      | --       |
| FBgn0266347            | nAChRalpha4       | ↑  | 1.51    | 0.000000 | -- | --      | --       |
| FBgn0028875            | nAChRalpha5       | ↑  | 1.78    | 0.000000 | -- | --      | --       |
| FBgn0032151            | nAChRalpha6       | ↑  | 1.42    | 0.000000 | -- | --      | --       |
| FBgn0086778            | nAChRalpha7       | ↑  | 1.59    | 0.000000 | -- | --      | --       |
| FBgn0000038            | nAChRbeta1        | ↑  | 1.72    | 0.000000 | -- | --      | --       |
| FBgn0004118            | nAChRbeta2        | ↑  | 1.55    | 0.000000 | -- | --      | --       |
| FBgn0010399            | Nmdar1            | ↑  | 1.75    | 0.000000 | -- | --      | --       |
| FBgn0053513            | Nmdar2            | ↑  | 1.53    | 0.000000 | -- | --      | --       |
| FBgn0024944            | Oamb              | ↑  | 1.74    | 0.000000 | -- | --      | --       |
| FBgn0004514            | Oct-TyrR          | ↑  | 1.47    | 0.000000 | -- | --      | --       |
| FBgn0038980            | Octbeta1R         | ↑  | 1.62    | 0.000000 | -- | --      | --       |
| FBgn0038063            | Octbeta2R         | ↑  | 1.60    | 0.000000 | -- | --      | --       |
| FBgn0250910            | Octbeta3R         | ↑  | 1.45    | 0.000000 | -- | --      | --       |
| FBgn0264908            | pHCl              | ↑  | 1.84    | 0.000000 | -- | --      | --       |
| FBgn0004244            | Rdl               | ↑  | 1.71    | 0.000000 | -- | --      | --       |
| FBgn0038542            | TyrR              | ↑  | 1.80    | 0.000000 | -- | --      | --       |
| FBgn0038541            | TyrRII            | ↑  | 1.80    | 0.000000 | -- | --      | --       |
| <b>Immune Response</b> |                   |    |         |          |    |         |          |
| FBgn0010388            | Drosocin          | ↓  | -12.75  | 0.000035 | ↓  | -24.68  | 0.002660 |
| FBgn0004240            | Diptericin A      | ↓  | -46.83  | 0.000000 | ↓  | -249.92 | 0.000203 |
| FBgn0034407            | Diptericin B      | ↓  | -10.98  | 0.008850 | ↓  | -40.03  | 0.001063 |
| FBgn0052279            | Drosomycin-like 2 | ↓  | -566.41 | 0.000000 | -- | --      | --       |
| FBgn0035434            | Drosomycin-like 5 | -- | --      | --       | ↓  | -3.99   | 0.000005 |
| FBgn0014865            | Metchnikowin      | ↓  | -9.69   | 0.007991 | ↓  | -9.59   | 0.005256 |
| FBgn0012042            | Attacin-A         | ↑  | 4.02    | 0.035974 | -- | --      | --       |
| FBgn0041579            | Attacin-C         | ↓  | -1.98   | 0.039617 | -- | --      | --       |



|             |                    |    |        |          |    |         |          |
|-------------|--------------------|----|--------|----------|----|---------|----------|
| FBgn0014018 | Relish             | ↑  | 1.16   | 0.000038 | -- | --      | --       |
| FBgn0260632 | dorsal             | ↑  | 1.14   | 0.003056 | -- | --      | --       |
| FBgn0033367 | Prophenoloxidase 2 | ↑  | 1.23   | 0.000000 | -- | --      | --       |
| FBgn0261363 | Prophenoloxidase 3 | -- | --     | --       | ↑  | 2.09    | 0.035861 |
| FBgn0004425 | Lysozyme B         | ↓  | -8.93  | 0.000000 | -- | --      | --       |
| FBgn0004426 | Lysozyme C         | ↓  | -6.47  | 0.000000 | -- | --      | --       |
| FBgn0004427 | Lysozyme D         | ↓  | -6.70  | 0.000000 | -- | --      | --       |
| FBgn0004430 | Lysozyme S         | ↑  | 1.12   | 0.037193 | -- | --      | --       |
| FBgn0004431 | Lysozyme X         | ↑  | 8.25   | 0.035271 | -- | --      | --       |
| FBgn0043576 | PGRP-SC1a          | ↓  | -13.57 | 0.000012 | ↓  | -22.20  | 0.000014 |
| FBgn0033327 | PGRP-SC1b          | ↓  | -18.33 | 0.000000 | -  | -       | -        |
| FBgn0043578 | PGRP-SB1           | -- | --     | --       | ↓  | -4.10   | 0.000000 |
| FBgn0035806 | PGRP-SD            | -- | --     | --       | ↓  | -3.47   | 0.000642 |
| FBgn0043841 | vir-1              | ↑  | 1.74   | 0.000000 | -- | --      | --       |
| FBgn0030051 | spirit             | ↑  | 3.36   | 0.000000 | -- | --      | --       |
| FBgn0053329 | Sp212              | ↑  | 2.27   | 0.026942 | ↑  | 6.20    | 0.000000 |
| FBgn0034647 | pirk               | ↓  | -2.16  | 0.001338 | -- | --      | --       |
| FBgn0033593 | Listericin         | ↓  | -9.23  | 0.000015 | -- | --      | --       |
| FBgn0261560 | Thor               | ↑  | 1.66   | 0.000000 | -- | --      | --       |
| FBgn0002930 | necrotic           | ↑  | 2.12   | 0.000000 | -- | --      | --       |
| FBgn0040653 | IM4                | -- | --     | --       | ↑  | 5.23    | 0.000194 |
| FBgn0031561 | IM33               | ↑  | 2.86   | 0.000000 | -- | --      | --       |
| FBgn0005660 | Ets21C             | ↑  | 1.57   | 0.000014 | -- | --      | --       |
| FBgn0026760 | Tehao              | ↓  | -3.63  | 0.000863 | -- | --      | --       |
| FBgn0016675 | Lectin-galC1       | ↑  | 1.89   | 0.000000 | -- | --      | --       |
| FBgn0038134 | wntD               | ↑  | 9.76   | 0.004648 | -- | --      | --       |
| FBgn0031055 | eye transformer    | ↑  | 1.84   | 0.000000 | -- | --      | --       |
| FBgn0037515 | Serine protease 7  | ↑  | 1.27   | 0.000847 | -- | --      | --       |
| FBgn0039494 | grass              | ↑  | 1.56   | 0.000015 | -- | --      | --       |
| FBgn0041182 | Tep2               | ↑  | 1.43   | 0.000000 | -- | --      | --       |
| FBgn0032638 | SPH93              | ↑  | 2.31   | 0.000000 | -- | --      | --       |
| FBgn0243514 | eater              | ↑  | 1.49   | 0.000016 | -- | --      | --       |
| FBgn0052185 | edin               | -- | --     | --       | ↓  | -100.61 | 0.000363 |
| FBgn0267339 | p38c               | -- | --     | --       | ↓  | -5.05   | 0.000000 |
| FBgn0014000 | Helical Factor     | ↑  | 2.31   | 0.000000 | -- | --      | --       |
| FBgn0038973 | Pebp1              | ↑  | 2.06   | 0.000000 | -- | --      | --       |
| FBgn0039102 | SPE                | ↑  | 2.52   | 0.021559 | -- | --      | --       |
